# Supplementary material for: Integrated genomic analysis revealed a dominant role of transcriptional regulation during the evolution of C4 photosynthesis in Flaveria species
Source: Research Square preprint supplement (doi:10.21203/rs.3.rs-4128148/v1), 2024-04-04
Supplement: Supplementary file 1 [file 3e84cc7fabb9b5255835b12a.pdf]

**Integrated genomic analysis revealed a dominant role of  
transcriptional regulation during the evolution of C<sub>4</sub> photosynthesis  
in *Flaveria* species**

Ming-Ju Amy Lyu<sup>1,9</sup>, Huilong Du<sup>2,3,9</sup>, Hongyan Yao<sup>4,9</sup>, Zhiguo Zhang<sup>5,9</sup>, Genyun Chen<sup>1</sup>, Yuhui Huang<sup>1,6</sup>, Xiaoxiang Ni<sup>1,6</sup>, Faming Chen<sup>1,6</sup>, Yong-Yao Zhao<sup>1,6</sup>, Qiming Tang<sup>1,6</sup>, Fenfen Miao<sup>1,6</sup>, Yanjie Wang<sup>1,6</sup>, Yuhui Zhao<sup>2</sup>, Hongwei Lu<sup>2</sup>, Lu Fang<sup>2</sup>, Qiang Gao<sup>2</sup>, Yiying Qi<sup>7</sup>, Qing Zhang<sup>7</sup>, Jisen Zhang<sup>7</sup>, Tao Yang<sup>8</sup>, Xuean Cui<sup>5</sup>, Chengzhi Liang<sup>2,3\$</sup>, Tiegang Lu<sup>5\$</sup>, Xin-Guang Zhu<sup>1,10\$</sup>

<sup>1</sup>State Key Laboratory of Plant Molecular Genetics, Center of Excellence for Molecular Plant Sciences, Chinese Academy of Sciences, Shanghai, China, 200032

<sup>2</sup>State Key Laboratory of Plant Genomics, Institute of Genetics and Developmental Biology, Innovation Academy for Seed Design, Chinese Academy of Sciences, Beijing, China;

<sup>3</sup>University of Chinese Academy of Sciences, Beijing, China; School of Life Sciences, Institute of Life Sciences and Green Development, Hebei University, Baoding, China.

<sup>4</sup>State Key Laboratory of Genetic Engineering, School of Life Sciences, Fudan University, Shanghai 200438, China

<sup>5</sup>Biotechnology Research Institute/National Key Facility for Gene Resources and Gene Improvement, Chinese Academy of Agricultural Sciences, Beijing, 100081, China

6. University of Chinese Academy of Sciences, Beijing 100049, China

7. Center for Genomics and Biotechnology, Fujian Provincial Key Laboratory of Haixia Applied Plant Systems Biology, Key Laboratory of Sugarcane Biology and Genetic Breeding, National Engineering Research Center for Sugarcane, College of Life Sciences, Fujian Agriculture and Forestry University, Fuzhou, China

8. China National GeneBank, Shenzhen, 518120, China.

9. These authors contributed equally

10. Lead Contact

\* Correspondence: [zhuxg@cemps.ac.cn](mailto:zhuxg@cemps.ac.cn) (X.G.Z), [lutiegang@caas.cn](mailto:lutiegang@caas.cn) (L.T.), [cliang@genetics.ac.cn](mailto:cliang@genetics.ac.cn) (C.L.)

## Supplemental Notes

### Table of content

|                                                                                                                                |    |
|--------------------------------------------------------------------------------------------------------------------------------|----|
| 1. Estimation of genome sizes of five <i>Flaveria</i> species using flow cytometry ...                                         | 3  |
| 2. Investigation of chromosome numbers using Fluorescence in situ hybridization assays .....                                   | 5  |
| 3. Estimation of genome assembly completeness.....                                                                             | 7  |
| 4. Comparison of protein-coding genes from Taniguchi's assemblies and our assemblies .....                                     | 11 |
| 5. Determination of functional copies of C <sub>4</sub> genes .....                                                            | 17 |
| 6. C <sub>4</sub> version of <i>PEPC-k</i> was absent in Fram plant sequenced in this study .....                              | 23 |
| 7. Verification of three copies of PEPC1 in the C <sub>4</sub> species Ftri.....                                               | 26 |
| 8. Investigation of tandem duplications of C <sub>4</sub> genes in other C <sub>4</sub> species.....                           | 28 |
| 9. Analysis of transposable elements and their effects on duplicated Ftri <i>PEPC1</i>                                         | 30 |
| 10. Prediction of <i>cis</i> -regulatory elements using ATAC-seq.....                                                          | 38 |
| 11. ERF <i>cis</i> -regulatory elements were abundant in photosynthesis related genes of different C <sub>3</sub> species..... | 40 |
| 12. Construction of gene regulatory networks .....                                                                             | 42 |
| 13. Comparison of transcript abundances based on RNA-seq data .....                                                            | 50 |
| 14. Comparison of protein abundance based on proteomics.....                                                                   | 53 |
| 15. Comparison of protein-to-transcript ratio.....                                                                             | 60 |
| References.....                                                                                                                | 65 |

## **1. Estimation of genome sizes of five *Flaveria* species using flow cytometry**

### **Method**

Genome size was estimated using flow-cytometry (FCM). For the FCM, *Solanum lycopersicum* (tomato, genome size 828 MB) was used as reference. Young leaves from multiple species were chopped with a blade soaked in nuclear isolation and staining buffer DAPI (NPE Analyzer, NPE 731085, USA). The suspension was filtered through a 40- $\mu$ m nylon mesh (Sysmex Cell Trics). Samples were analyzed with a MD FACS Melody flow cytometer and data was analyzed using Kaluza software.

### **Results**

The genome size of the five *Flaveria* species was estimated to be 0.45G for Frob, 1.2G for Fson, 1.86G for Flin, 1.62G for Fram and 1.65G for and Ftri (Fig. S 1)

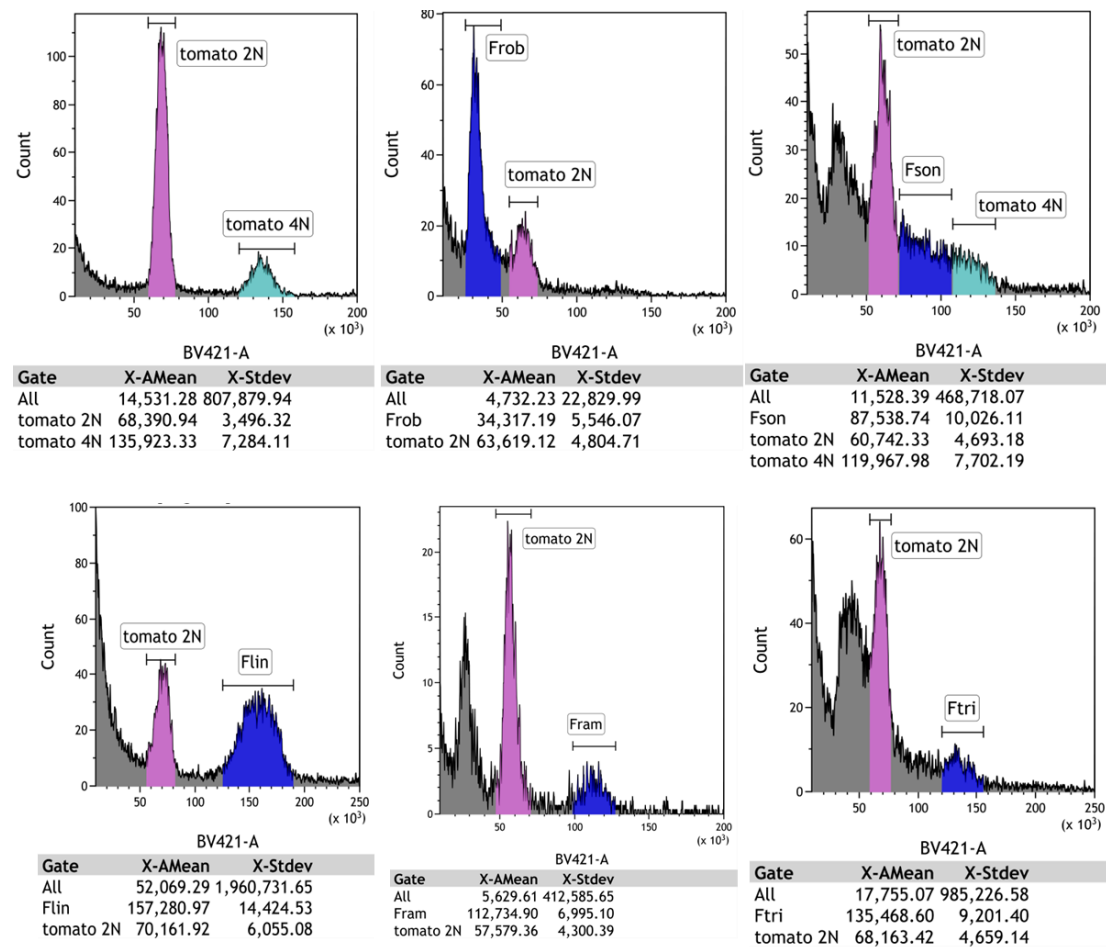

| Tomato genome size (2n) in bp: 827,747,456 |                              |                    |                            |
|--------------------------------------------|------------------------------|--------------------|----------------------------|
| Species                                    | X-mean ( <i>Flaveria</i> 2n) | X-mean (tomato 2n) | Estimated genome size (bp) |
| Frob (C <sub>3</sub> )                     | 34317.19                     | 63619.12           | 447,039,887                |
| Fson (C <sub>3</sub> -C <sub>4</sub> )     | 87538.74                     | 60742.19           | 1,194,351,222              |
| Flin (C <sub>3</sub> -C <sub>4</sub> )     | 157280.97                    | 70161.92           | 1,857,791,309              |
| Fram (C <sub>3</sub> -C <sub>4</sub> )     | 112734.9                     | 57579.36           | 1,622,608,563              |
| Ftri (C <sub>4</sub> )                     | 135468.6                     | 68163.42           | 1,647,060,239              |

**Fig. S 1. Estimation of genome size using flow-cytometry**

*Solanum lycopersicum* (tomato, genome size: 828 MB) was used as a reference. Samples were mixed for measurement as (a) only tomato, (b) Frob and tomato, (c) Fson and tomato, (d) Flin and tomato, (e) Fram and tomato and (f) Ftri and tomato. Young leaves from multiple species were chopped with a blade in nuclear isolation and the staining buffer DAPI. Estimated genome size of *Flaveria* species according to tomato are shown in (g). (Abbreviations: Frob: *F. robusta*; Fson: *F. sonorensis*; Flin: *F. linearis*; Fram: *F. ramosissima*; Ftri: *F. trinervia*)

## 2. Investigation of chromosome numbers using Fluorescence in situ hybridization assays

### Methods

To investigate the chromosome number of Frob, Flin and Ftri, mitotic metaphase spreads were prepared from meristem root tip cells following a previously published method<sup>1</sup> with minor modifications. Briefly, root tips approximately 1 cm in length were cut and pretreated with nitrous oxide gas for 1-3 hours. The root tips were then fixed in ice-cold 90% acetic acid for 10 minutes and stored in 70% ethanol at - 20 °C. Root segments with actively dividing regions were excised and incubated in an enzyme mixture containing 1% (w/w) pectolyase Y-23 (Yakult Pharmaceutical, Tokyo, Japan) and 2% (w/w) cellulose Onozuka R-10 (Yakult Pharmaceutical) for 30-50 minutes at 37 °C. After digestion, the root sections were washed twice in 75% ethanol. The root sections were fine-broken with a needle and treated in vortex machine at 2000 rpm for 20 seconds. The cells were collected by centrifugation and re-suspended in 30 ml 100% acetic acid to prepare a cell suspension. The cell suspension (5~8 µL) was placed onto glass slides in a moist box and dried. The slides were cross-linked in an ultraviolet cross-linking instrument and dyed using DAPI (NPE Analyzer, NPE 731085, USA), before being viewed under a microscope (Leica DM2500).

### Results

The chromosome number was 2x18 in all the three analyzed species (Fig.1a), in line with previous reports. Additionally, Hi-C assembly supported the chromosome number of 18 for all five *Flaveria* species ( Fig. S 1). The synteny of the 18 chromosomes was conserved across the five *Flaveria* species; from 50% to 75% of protein coding genes being colinear between Frob and the other species (Table S 1).

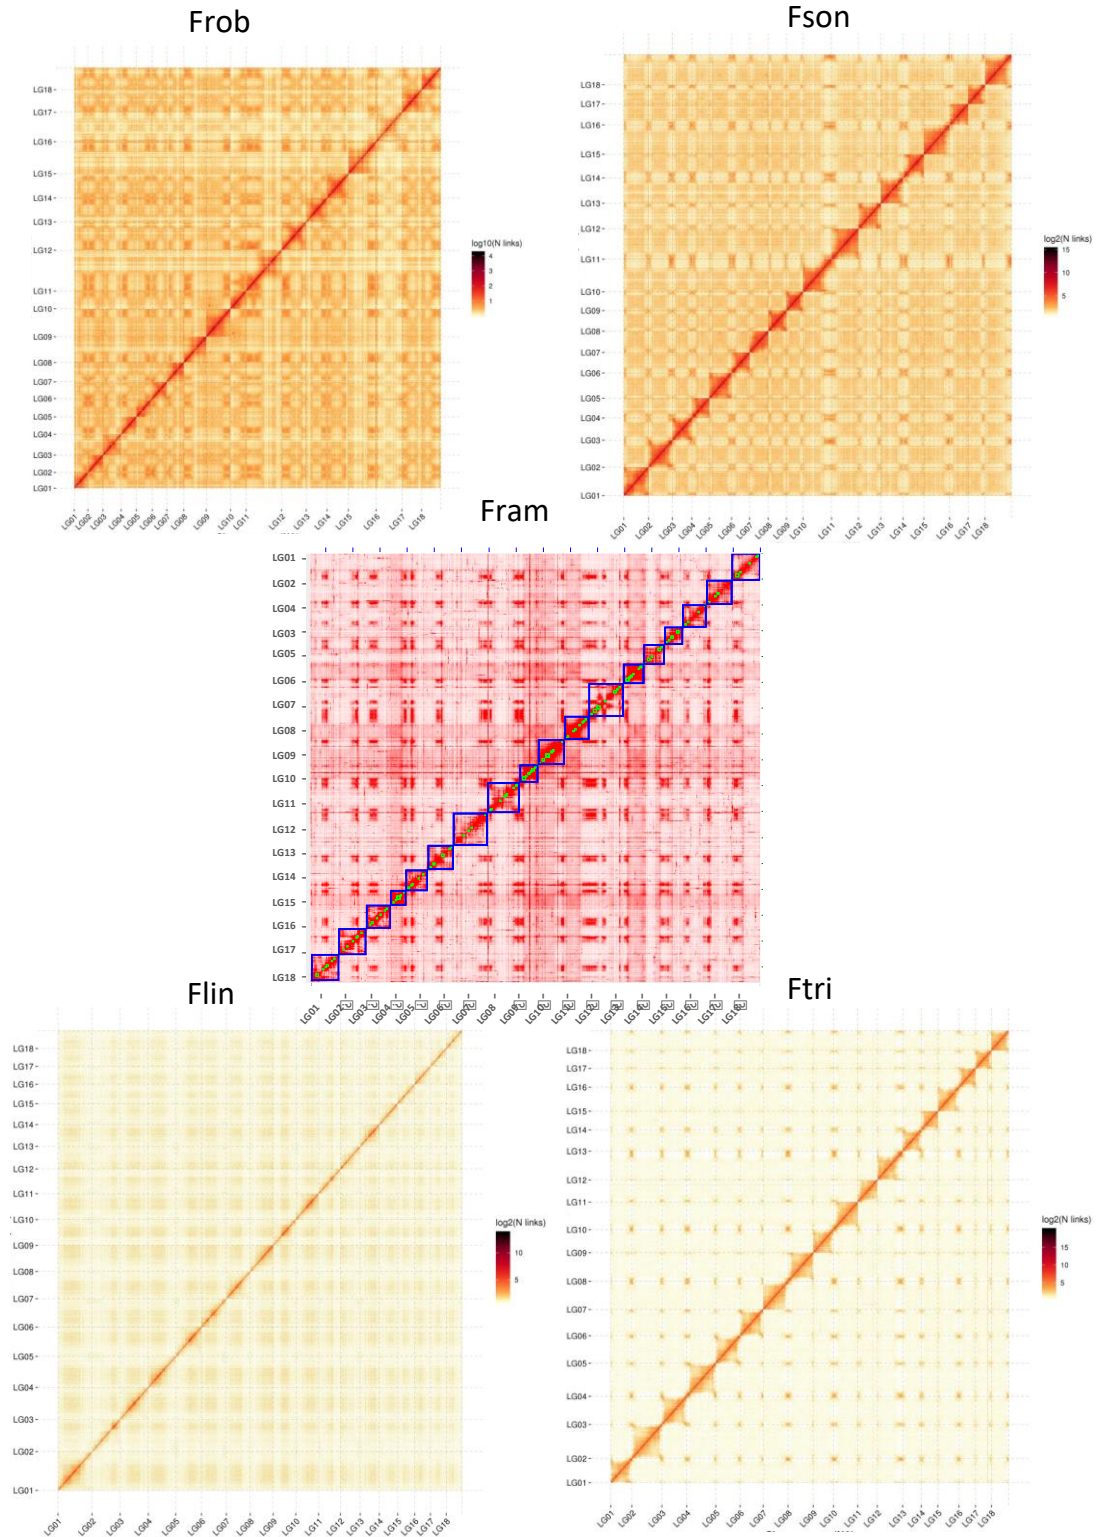

**Fig. S 2. Contact maps of the chromosomes of each *Flaveria* species**

Normalized Hi-C contract matrix and assembled chromosomes number from 1 to 18 are shown in fragments of 100kb. X and Y lab show the chromosomes numbered from 1 to 18.

Table S 1. **The proportions of colinear genes between Frob and the other four sequenced *Flaveria* species**

| Pair          | % Collinearity |
|---------------|----------------|
| Fson vs. Frob | 72.46          |
| Flin vs. Frob | 50.15          |
| Fram vs. Frob | 51.96          |
| Ftri vs. Frob | 75.37          |

### 3. Estimation of genome assembly completeness

#### Methods:

The completeness of genome assembly was estimated in three methods. First, The completeness of protein repertoire was estimated using Benchmarking Universal Single Copy Orthologues (BUSCO) (v3.0.2) <sup>2</sup> against a viridiplantae reference. Second, the completeness of genome assembly was estimated through RNA-seq mapping. RNA short reads sequencing was performed using the Illumina platform to obtain paired-ended reads with a length of 150 bp. RNA-seq reads from multiple experiments were mapped to the assembled genome sequences applying RSEM <sup>3</sup> in default parameters, where STAR (v2.7.3a) <sup>4</sup> was selected as the mapping tool. Third, the completeness of genome assembly was estimated through DNA-seq short reads mapping. DNA short reads sequencing was performed using the Illumina platform to obtain paired-ended reads with a length of 150 bp. DNA-seq reads were mapped to genome apply bowtie2 (v2.3.4.3) <sup>5</sup> in with “-k 10”.

#### Results

BUSCO results demonstrated that 99.2% (Frob) to 92.5% (Flin) of BUSCO genes were covered (Table S 2). RNA-seq reads mapping results showed that a total of 3,290 million reads from five independent experiments were used for the five *Flaveria* species, and from 21 to 34 million reads were generated for each sample. For Frob, Fson, Fram and Ftri, between 92.0% and 97.6% of RNA-seq reads were mapped to corresponding genomes. Flin had a relatively lower mapping rates than other species, *i.e.*, around 86.7% to 90%. RNA-seq datasets from Flin from the high light experiment were generated using a different accession of Flin, which had relatively

lower mapping rates, *i.e.*, around 80% (Table S 3). DNA-seq reads mapping results indicated that 1,110 million reads in total were used for the five *Flaveria* species, and between 170 and 324 million reads were generated for each species. From 95% to 98% paired-end reads were mapped to corresponding assembled genomes (Table S 4). Therefore, the above results suggested completeness and high quality of the genome assembly.

Table S 2. Statistics of BUSCO analysis

| Species                                       | Complete (%) | Complete (single) (%) | Complete (duplicated) (%) |
|-----------------------------------------------|--------------|-----------------------|---------------------------|
| <b>Frob</b> (C <sub>3</sub> )                 | 99.2         | 89.6                  | 9.6                       |
| <b>Fson</b> (C <sub>3</sub> -C <sub>4</sub> ) | 98.1         | 89.6                  | 8.5                       |
| <b>Flin</b> (C <sub>3</sub> -C <sub>4</sub> ) | 92.5         | 86.4                  | 6.1                       |
| <b>Fram</b> (C <sub>3</sub> -C <sub>4</sub> ) | 95           | 88.4                  | 6.6                       |
| <b>Ftri</b> (C <sub>4</sub> )                 | 95.1         | 91.1                  | 4                         |

Table S 3. Statistics of RNA-seq mapping

| 2-week low CO <sub>2</sub> experiment | # Total reads | Unique mapping ratio (%) | Multiple mapping ratio (%) | Total mapping ratio (%) |
|---------------------------------------|---------------|--------------------------|----------------------------|-------------------------|
| <b>Flin_2w_L_1</b> <sup>@</sup>       | 26106017      | 77.8                     | 8.9                        | 86.7                    |
| <b>Flin_2w_L_2</b>                    | 33219838      | 79.6                     | 9.8                        | 89.4                    |
| <b>Flin_2w_L_3</b>                    | 28760467      | 78.7                     | 8.9                        | 87.6                    |
| <b>Flin_2w_N_1</b>                    | 31595547      | 80.5                     | 9.5                        | 90.0                    |
| <b>Flin_2w_N_2</b>                    | 32903828      | 80.3                     | 9.7                        | 90.0                    |
| <b>Flin_2w_N_3</b>                    | 33093266      | 80.6                     | 9.7                        | 90.3                    |
| <b>Fram_2w_L_1</b>                    | 34936336      | 88.4                     | 3.7                        | 92.1                    |
| <b>Fram_2w_L_2</b>                    | 32185750      | 88.8                     | 3.5                        | 92.3                    |
| <b>Fram_2w_L_3</b>                    | 35172051      | 88.2                     | 3.6                        | 91.8                    |
| <b>Fram_2w_N_1</b>                    | 15860328      | 88.3                     | 3.7                        | 92.0                    |
| <b>Fram_2w_N_2</b>                    | 24661281      | 88.5                     | 3.6                        | 92.2                    |
| <b>Fram_2w_N_3</b>                    | 34759285      | 88.4                     | 3.8                        | 92.2                    |
| <b>Frob_2w_L_1</b>                    | 33887554      | 91.2                     | 5.6                        | 96.7                    |
| <b>Frob_2w_L_2</b>                    | 36520872      | 91.6                     | 5.5                        | 97.1                    |
| <b>Frob_2w_L_3</b>                    | 28938440      | 91.2                     | 5.6                        | 96.8                    |
| <b>Frob_2w_N_1</b>                    | 33760952      | 91.0                     | 5.8                        | 96.8                    |
| <b>Frob_2w_N_2</b>                    | 26874262      | 91.1                     | 5.7                        | 96.8                    |
| <b>Frob_2w_N_3</b>                    | 34406245      | 91.3                     | 5.8                        | 97.1                    |
| <b>Fson_2w_L_1</b>                    | 28557889      | 91.7                     | 4.2                        | 95.9                    |
| <b>Fson_2w_L_2</b>                    | 26985392      | 91.7                     | 4.1                        | 95.8                    |
| <b>Fson_2w_L_3</b>                    | 34615832      | 91.7                     | 4.2                        | 95.9                    |



|                    |          |      |     |      |
|--------------------|----------|------|-----|------|
| <b>Fson_2w_N_1</b> | 28463981 | 91.5 | 4.3 | 95.8 |
| <b>Fson_2w_N_2</b> | 26500228 | 91.6 | 4.4 | 95.9 |
| <b>Fson_2w_N_3</b> | 32336172 | 91.8 | 4.3 | 96.1 |
| <b>Ftri_2w_L_1</b> | 35188793 | 92.2 | 4.3 | 96.5 |
| <b>Ftri_2w_L_2</b> | 29165653 | 89.0 | 7.4 | 96.4 |
| <b>Ftri_2w_L_3</b> | 32889783 | 92.3 | 4.4 | 96.6 |
| <b>Ftri_2w_N_1</b> | 31460531 | 92.2 | 4.0 | 96.2 |
| <b>Ftri_2w_N_2</b> | 32803186 | 92.5 | 4.1 | 96.6 |
| <b>Ftri_2w_N_3</b> | 29192442 | 92.6 | 3.9 | 96.5 |

---

| <b>4-week low CO<sub>2</sub> experiment</b> | <b># Total reads</b> | <b>Unique mapping ratio (%)</b> | <b>Multiple mapping ratio (%)</b> | <b>Total mapping ratio (%)</b> |
|---------------------------------------------|----------------------|---------------------------------|-----------------------------------|--------------------------------|
| <b>Flin_4w_L_1</b>                          | 28,713,204           | 81.7                            | 9.5                               | 91.1                           |
| <b>Flin_4w_L_2</b>                          | 23,778,224           | 81.5                            | 9.4                               | 90.9                           |
| <b>Flin_4w_L_3</b>                          | 26,102,203           | 81.1                            | 9.6                               | 90.7                           |
| <b>Flin_4w_N_1</b>                          | 24,809,359           | 80.9                            | 9.6                               | 90.5                           |
| <b>Flin_4w_N_2</b>                          | 24,953,829           | 80.6                            | 9.9                               | 90.5                           |
| <b>Flin_4w_N_3</b>                          | 23,095,900           | 80.3                            | 9.9                               | 90.1                           |
| <b>Fram_4w_L_1</b>                          | 26,122,863           | 88.9                            | 3.5                               | 92.4                           |
| <b>Fram_4w_L_2</b>                          | 19,480,458           | 89.3                            | 3.6                               | 92.8                           |
| <b>Fram_4w_L_3</b>                          | 25,266,411           | 89.4                            | 3.5                               | 92.9                           |
| <b>Fram_4w_N_1</b>                          | 22,702,731           | 89.3                            | 3.5                               | 92.8                           |
| <b>Fram_4w_N_2</b>                          | 25,915,298           | 89.5                            | 3.5                               | 93.0                           |
| <b>Fram_4w_N_3</b>                          | 25,468,944           | 89.5                            | 3.5                               | 93.0                           |
| <b>Frob_4w_L_1</b>                          | 23,432,277           | 91.5                            | 5.7                               | 97.3                           |
| <b>Frob_4w_L_2</b>                          | 24,386,859           | 90.9                            | 5.7                               | 96.6                           |
| <b>Frob_4w_L_3</b>                          | 21,307,320           | 91.4                            | 5.6                               | 97.0                           |
| <b>Frob_4w_N_1</b>                          | 28,024,652           | 91.2                            | 5.9                               | 97.1                           |
| <b>Frob_4w_N_2</b>                          | 26,865,706           | 91.1                            | 5.9                               | 97.0                           |
| <b>Frob_4w_N_3</b>                          | 25,369,429           | 90.9                            | 5.9                               | 96.8                           |
| <b>Fson_4w_L_1</b>                          | 25,504,504           | 91.8                            | 4.2                               | 96.0                           |
| <b>Fson_4w_L_2</b>                          | 16,723,354           | 91.9                            | 4.3                               | 96.2                           |
| <b>Fson_4w_L_3</b>                          | 29,653,035           | 92.1                            | 4.2                               | 96.3                           |
| <b>Fson_4w_N_1</b>                          | 27,538,862           | 91.3                            | 4.5                               | 95.8                           |
| <b>Fson_4w_N_2</b>                          | 26,785,677           | 91.8                            | 4.3                               | 96.2                           |
| <b>Fson_4w_N_3</b>                          | 29,476,651           | 91.8                            | 4.3                               | 96.2                           |
| <b>Ftri_4w_L_1</b>                          | 28,423,320           | 92.0                            | 4.7                               | 96.8                           |
| <b>Ftri_4w_L_2</b>                          | 27,234,665           | 92.4                            | 4.7                               | 97.0                           |
| <b>Ftri_4w_L_3</b>                          | 26,384,930           | 91.0                            | 4.6                               | 95.6                           |
| <b>Ftri_4w_N_1</b>                          | 28,143,172           | 92.3                            | 4.5                               | 96.8                           |
| <b>Ftri_4w_N_2</b>                          | 23,287,687           | 92.4                            | 4.4                               | 96.8                           |
| <b>Ftri_4w_N_3</b>                          | 22,794,859           | 92.6                            | 4.5                               | 97.1                           |

---

| <b>6-month low CO<sub>2</sub> experiment</b> | <b># Total reads</b> | <b>Unique mapping ratio (%)</b> | <b>Multiple mapping ratio (%)</b> | <b>Total mapping ratio (%)</b> |
|----------------------------------------------|----------------------|---------------------------------|-----------------------------------|--------------------------------|
|----------------------------------------------|----------------------|---------------------------------|-----------------------------------|--------------------------------|

|                    |          |      |     |      |
|--------------------|----------|------|-----|------|
| <b>Fram_6m_L_1</b> | 21847410 | 90.0 | 3.5 | 93.5 |
| <b>Fram_6m_L_2</b> | 20826620 | 89.7 | 3.6 | 93.2 |
| <b>Fram_6m_L_3</b> | 20952186 | 90.0 | 3.6 | 93.6 |
| <b>Fram_6m_L_4</b> | 20198206 | 89.7 | 3.5 | 93.3 |
| <b>Fson_6m_L_1</b> | 21858279 | 92.1 | 4.5 | 96.7 |
| <b>Fson_6m_L_2</b> | 24323857 | 92.4 | 4.3 | 96.8 |
| <b>Fson_6m_L_3</b> | 20875634 | 92.5 | 4.4 | 96.9 |
| <b>Fson_6m_L_4</b> | 24896827 | 91.3 | 4.5 | 95.8 |

  

| <b>ABA experiment</b>        | <b># Total reads</b> | <b>Unique mapping ratio (%)</b> | <b>Multiple mapping ratio (%)</b> | <b>Total mapping ratio (%)</b> |
|------------------------------|----------------------|---------------------------------|-----------------------------------|--------------------------------|
| <b>Fro-ABA-1</b>             | 22,810,323           | 92.4                            | 3.7                               | 96.0                           |
| <b>Fro-ABA-2</b>             | 26,320,179           | 92.4                            | 4.4                               | 96.8                           |
| <b>Fro-ABA-3<sup>#</sup></b> | 23,003,611           | 92.0                            | 5.6                               | 97.6                           |
| <b>Fro-Ctrl-1</b>            | 26,087,085           | 92.4                            | 4.0                               | 96.4                           |
| <b>Fro-Ctrl-2</b>            | 21,806,118           | 91.3                            | 5.1                               | 96.4                           |
| <b>Fro-Ctrl-3</b>            | 34,675,444           | 92.6                            | 4.5                               | 97.0                           |
| <b>Fso-ABA-1</b>             | 26,905,126           | 92.0                            | 3.3                               | 95.3                           |
| <b>Fso-ABA-2</b>             | 24,545,444           | 92.7                            | 4.1                               | 96.7                           |
| <b>Fso-ABA-3</b>             | 25,535,466           | 91.9                            | 5.9                               | 97.8                           |
| <b>Fso-Ctrl-1</b>            | 26,002,565           | 92.4                            | 4.3                               | 96.7                           |
| <b>Fso-Ctrl-2</b>            | 28,004,493           | 92.4                            | 4.5                               | 96.9                           |
| <b>Fso-Ctrl-3</b>            | 25,087,187           | 91.8                            | 5.1                               | 96.9                           |
| <b>Fra-ABA-1</b>             | 22,157,100           | 88.4                            | 4.7                               | 93.2                           |
| <b>Fra-ABA-3</b>             | 24,617,078           | 89.2                            | 3.3                               | 92.5                           |
| <b>Fra-ABA-4</b>             | 22,164,481           | 88.3                            | 5.6                               | 93.9                           |
| <b>Fra-Ctrl-1</b>            | 28,575,584           | 88.6                            | 3.4                               | 92.0                           |
| <b>Fra-Ctrl-2</b>            | 27,412,141           | 88.6                            | 4.3                               | 92.9                           |
| <b>Fra-Ctrl-3</b>            | 26,981,126           | 89.2                            | 4.5                               | 93.7                           |
| <b>Ftr-ABA-1</b>             | 24,748,259           | 92.4                            | 3.5                               | 95.9                           |
| <b>Ftr-ABA-2</b>             | 23,080,636           | 91.7                            | 5.4                               | 97.1                           |
| <b>Ftr-ABA-3</b>             | 25,120,473           | 91.2                            | 6.0                               | 97.2                           |
| <b>Ftr-Ctrl-1</b>            | 22,970,780           | 93.0                            | 3.7                               | 96.7                           |
| <b>Ftr-Ctrl-2</b>            | 23,937,914           | 92.4                            | 3.7                               | 96.1                           |
| <b>Ftr-Ctrl-3</b>            | 26,571,868           | 92.7                            | 4.4                               | 97.1                           |
| <b>Average</b>               | 26,830,957           | 89.6                            | 5.1                               | 94.8                           |

  

| <b>High-light experiment &amp;</b> | <b># Total reads</b> | <b>Unique mapping ratio (%)</b> | <b>Multiple mapping ratio (%)</b> | <b>Total mapping ratio (%)</b> |
|------------------------------------|----------------------|---------------------------------|-----------------------------------|--------------------------------|
| <b>Frob_HL_H_1</b>                 | 32059692             | 75.9                            | 6.8                               | 82.7                           |
| <b>Frob_HL_H_2</b>                 | 29783728             | 71.9                            | 10.3                              | 82.3                           |
| <b>Frob_HL_H_3</b>                 | 31070734             | 74.9                            | 6.9                               | 81.9                           |
| <b>Frob_HL_L_1</b>                 | 32903035             | 75.6                            | 6.1                               | 81.7                           |
| <b>Frob_HL_L_2</b>                 | 30903465             | 77.4                            | 6.8                               | 84.2                           |
| <b>Frob_HL_L_3</b>                 | 31645641             | 77.9                            | 5.8                               | 83.6                           |

|                    |          |      |     |      |
|--------------------|----------|------|-----|------|
| <b>Flin_HL_H_1</b> | 33192028 | 72.0 | 9.2 | 81.2 |
| <b>Flin_HL_H_2</b> | 24233911 | 70.6 | 9.1 | 79.7 |
| <b>Flin_HL_H_3</b> | 22992824 | 69.2 | 8.9 | 78.1 |
| <b>Flin_HL_L_1</b> | 30945129 | 71.7 | 9.1 | 80.8 |
| <b>Flin_HL_L_2</b> | 20898845 | 71.2 | 9.1 | 80.3 |
| <b>Flin_HL_L_3</b> | 36695522 | 71.6 | 9.1 | 80.8 |
| <b>Fram_HL_H_1</b> | 33766904 | 75.4 | 4.5 | 80.0 |
| <b>Fram_HL_H_2</b> | 34883202 | 77.1 | 4.6 | 81.7 |
| <b>Fram_HL_H_3</b> | 34641349 | 76.3 | 4.7 | 81.0 |
| <b>Fram_HL_L_1</b> | 36517568 | 77.3 | 4.9 | 82.2 |
| <b>Fram_HL_L_2</b> | 40191972 | 75.6 | 4.8 | 80.4 |
| <b>Fram_HL_L_3</b> | 33976982 | 77.3 | 4.7 | 82.0 |
| <b>Ftri_HL_H_1</b> | 41616357 | 76.7 | 4.8 | 81.5 |
| <b>Ftri_HL_H_2</b> | 41633337 | 77.4 | 4.5 | 81.9 |
| <b>Ftri_HL_H_3</b> | 42552571 | 77.0 | 4.8 | 81.8 |
| <b>Ftri_HL_L_1</b> | 43200463 | 75.4 | 4.4 | 79.8 |
| <b>Ftri_HL_L_2</b> | 43456489 | 77.6 | 4.8 | 82.5 |
| <b>Ftri_HL_L_3</b> | 37944526 | 76.1 | 4.5 | 80.7 |

@ Sample with the lowest mapping ratio

# Sample with the highest mapping ratio

& High light experiment was not included for computing average mapping ratio.

Table S 4. DNA-seq mapping statistics

| <b>Species</b>                            | <b># Total reads</b> | <b># Mapped reads</b> | <b>Mapping ratio (%)</b> | <b>Properly mapped reads</b> | <b>Properly mapping ratio (%)</b> |
|-------------------------------------------|----------------------|-----------------------|--------------------------|------------------------------|-----------------------------------|
| <b>Frob (C<sub>3</sub>)</b>               | 232,281,182          | 231,705,950           | 99.75                    | 227,820,606                  | 98.08                             |
| <b>Fson (C<sub>3</sub>-C<sub>4</sub>)</b> | 189,408,029          | 188,479,930           | 99.51                    | 184,350,835                  | 97.33                             |
| <b>Flin (C<sub>3</sub>-C<sub>4</sub>)</b> | 170,714,985          | 169,980,392           | 99.57                    | 163,505,538                  | 95.78                             |
| <b>Fram (C<sub>3</sub>-C<sub>4</sub>)</b> | 324,792,136          | 323,557,926           | 99.62                    | 309,332,030                  | 95.24                             |
| <b>Ftri (C<sub>4</sub>)</b>               | 202,443,727          | 201,073,807           | 99.32                    | 191,310,924                  | 94.50                             |

#### 4. Comparison of protein-coding genes from Taniguchi's assemblies and our assemblies

##### Methods

The published cDNA sequences from four *Flaveria* species obtained from Taniguchi's assembly <sup>6</sup>. Open reading frames (ORFs) of cDNA were predicted by

applying OrfPredictor <sup>7</sup> using default parameters. Genes with an ORF of no less than 100 amino acids were retained for comparisons in both Taniguchi's assembly and our assembly. For Frob, genes from one assembly (either Taniguchi's assembly or our assembly) with counterparts found in another assembly were predicted using Blastp (v2.2.31+) <sup>8</sup> with an E-value threshold of 0.001. Protein identities were obtained from Blastp outputs.

## Results

We compared the predicted protein-coding genes from our assembly with those from Taniguchi's assembly <sup>6</sup>. While more protein coding genes were reported in Taniguchi's assembly, approximately 30.7~35.6% of annotated genes were less than 100 amino acid in protein length <sup>6</sup>, while the proportion of those in the five species reported here is ~4% (Fig. S 3). Frob is the only species used in both and Taniguchi's assembly and ours. For Frob, 96.1% of the genes with protein length  $\geq 100$  amino acids from Taniguchi's assembly were covered in our assembly (Blastp, E-value $<0.001$ ). In contrast, 96.3% of the genes with protein length  $\geq 100$  amino acids in our assembly were also covered by Taniguchi's assembly (Blastp, E-value $<0.001$ , Fig. S 4). Therefore, the annotated protein-coding genes in this study can be considered reliable.

We attempted to incorporate protein annotations from Taniguchi's assemblies into our evolutionary comparison study. However, we encountered challenges as several crucial C<sub>4</sub> enzymes, such as CA1, PEPC1, and NADP-ME4, exhibited no annotations sequences in the C<sub>4</sub> species *F. bidentis* (Fig. S 5). Consequently, we opted to exclude the comparison study involving Taniguchi's data in this analysis.

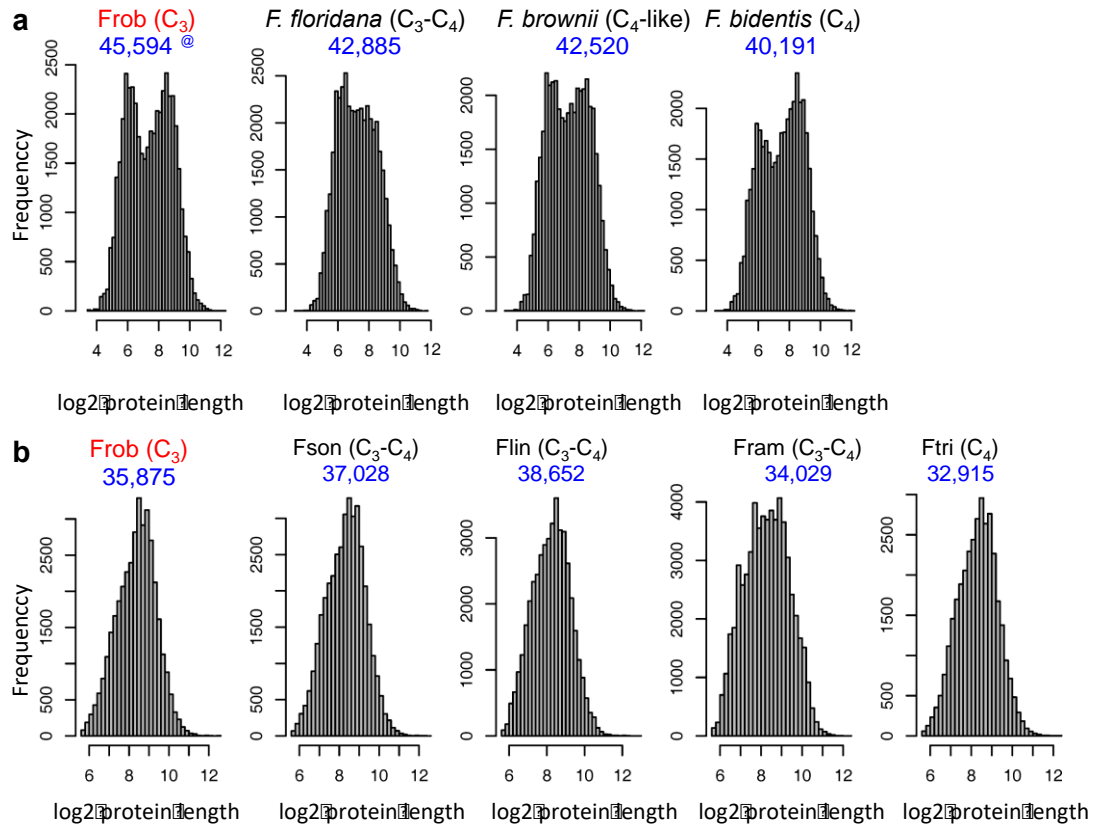

**Fig. S 3. Comparison of the protein length of predicted genes from our genome assembly as well as a published genome assembly**

(a) Histograms showing the distribution protein length of the four *Flaveria* species from Taniguchi's report <sup>6</sup>. (b) Histograms indicate the distribution protein length of the five *Flaveria* species from our study. The number of annotated protein-coding genes are indicated under the name of species in blue font. Frob is the only common species between the two studies. (Note: @ The number of protein-coding genes as reported originally in Taniguchi's assembly are 46138/43016/42802/40631 for Frob/*F. floridana*/*F. brownii*/*F. bidentis* respectively. The number of protein-coding genes on the histograms are the number of genes with open reading frames, therefore, the numbers are slightly lower than those originally reported)

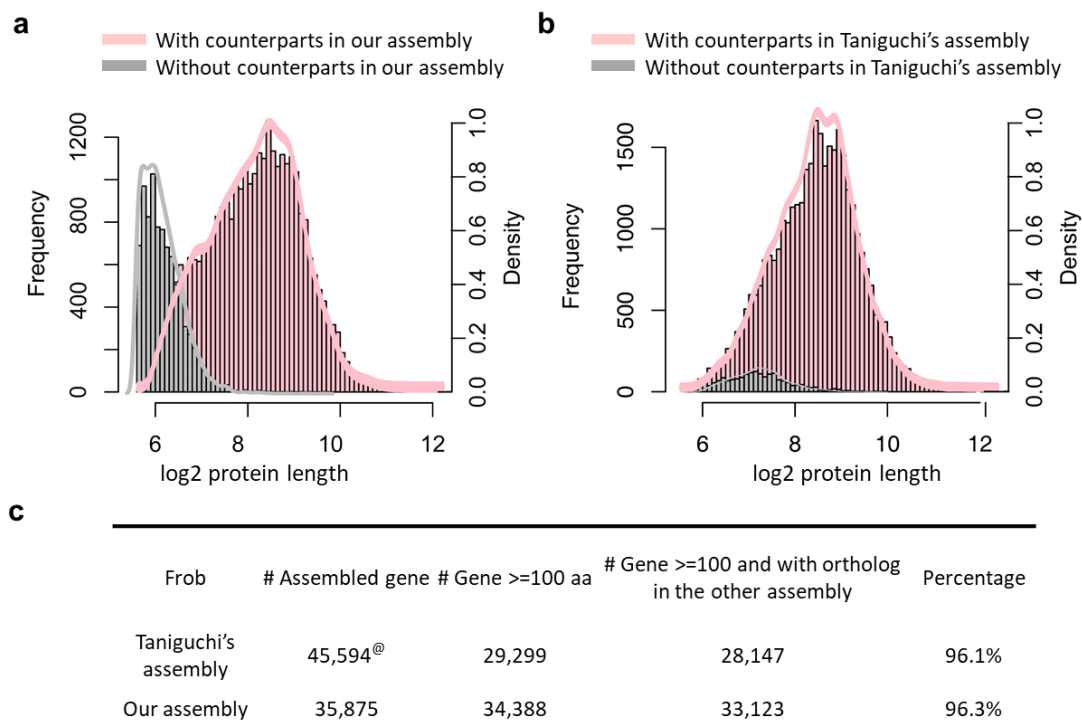

**Fig. S 4. Comparison of the annotated Frob protein from Taniguchi's assembly and our assembly**

Genes with counterparts in another assembly (either ours or Taniguchi's) were predicted. (a) The distribution of protein length of genes from Taniguchi's assembly with or without counterparts in our assembly are illustrated in pink and grey respectively. (b) The distribution of protein length of genes from our assembly with or without orthologs in Taniguchi's assembly are illustrated in pink and grey respectively. (c) Statistics of annotated protein coding genes and those with counterparts in the other assembly. (Note: <sup>@</sup> The number of protein-coding gene reported originally in Taniguchi's assembly <sup>6</sup> is 46,138.)

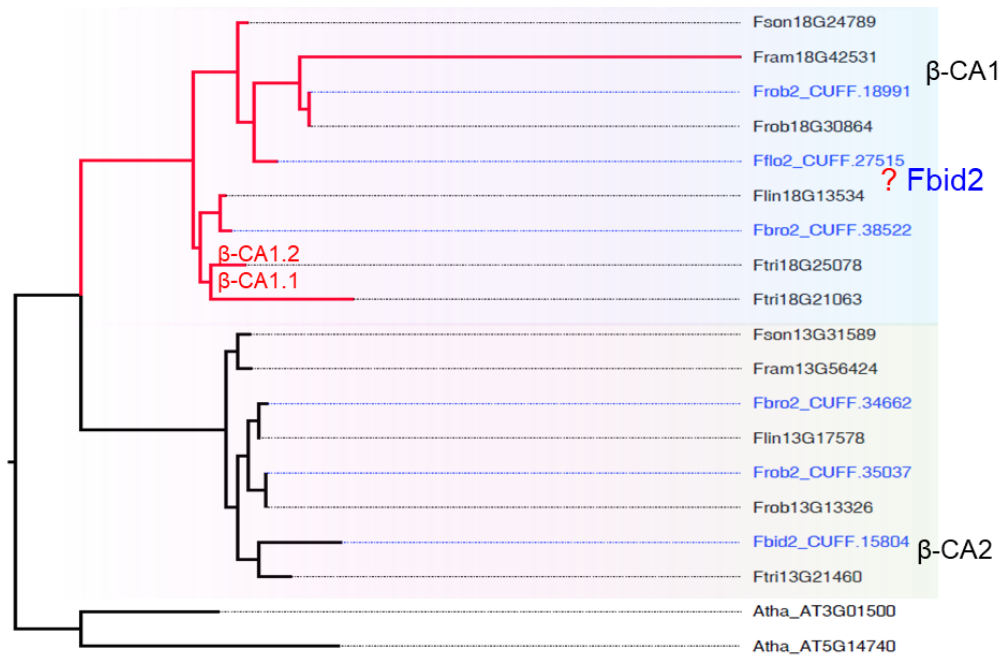

- From published assemblies: Frob2 ( $C_3$ ), Fflo2 ( $C_3$ - $C_4$ ), Fbro2 ( $C_4$ -like), Fbid2 ( $C_4$ )
- From our assemblies: Frob ( $C_3$ ), Fson ( $C_3$ - $C_4$ ), Fram ( $C_3$ - $C_4$ ), Ftri ( $C_4$ )

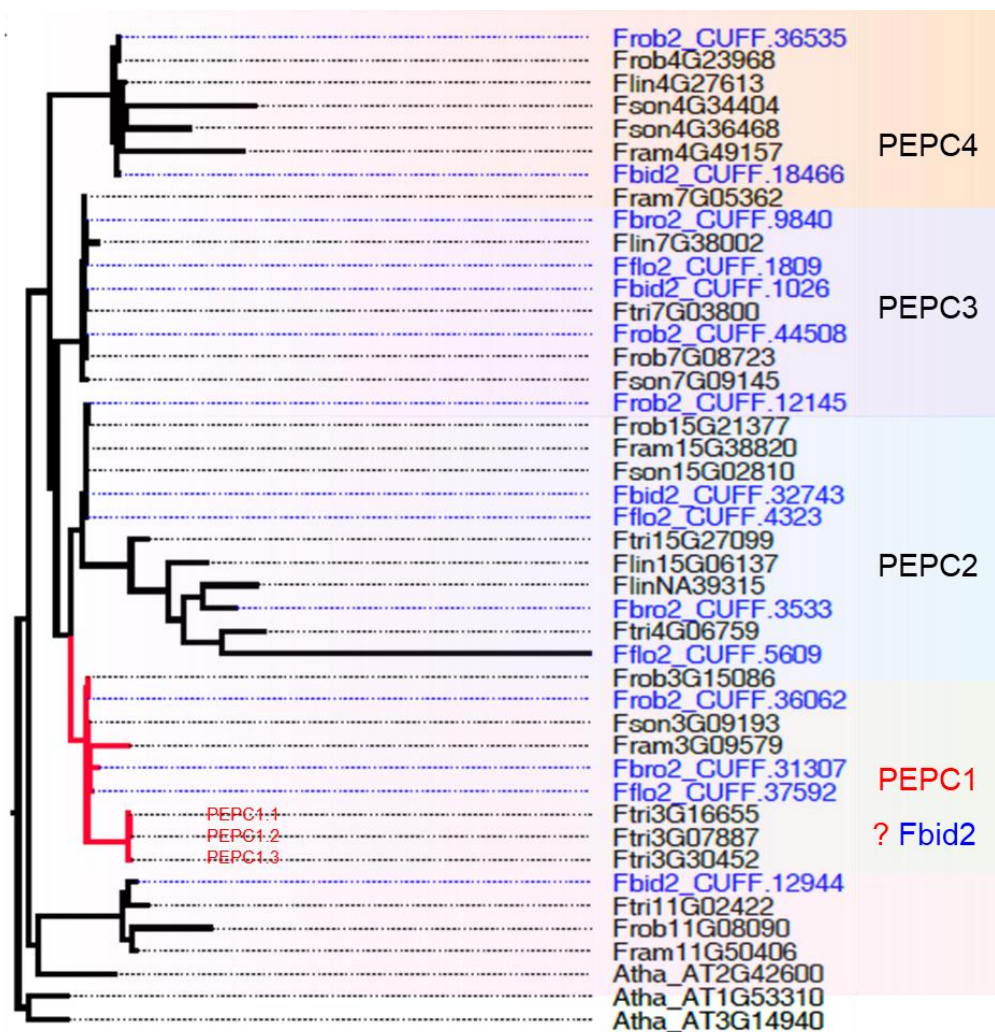

- From published assemblies: Frob2 (C<sub>3</sub>), Fflo2 (C<sub>3</sub>-C<sub>4</sub>), Fbro2 (C<sub>4</sub>-like), Fbid2 (C<sub>4</sub>)
- From our assemblies: Frob (C<sub>3</sub>), Fson (C<sub>3</sub>-C<sub>4</sub>), Fram (C<sub>3</sub>-C<sub>4</sub>), Ftri (C<sub>4</sub>)



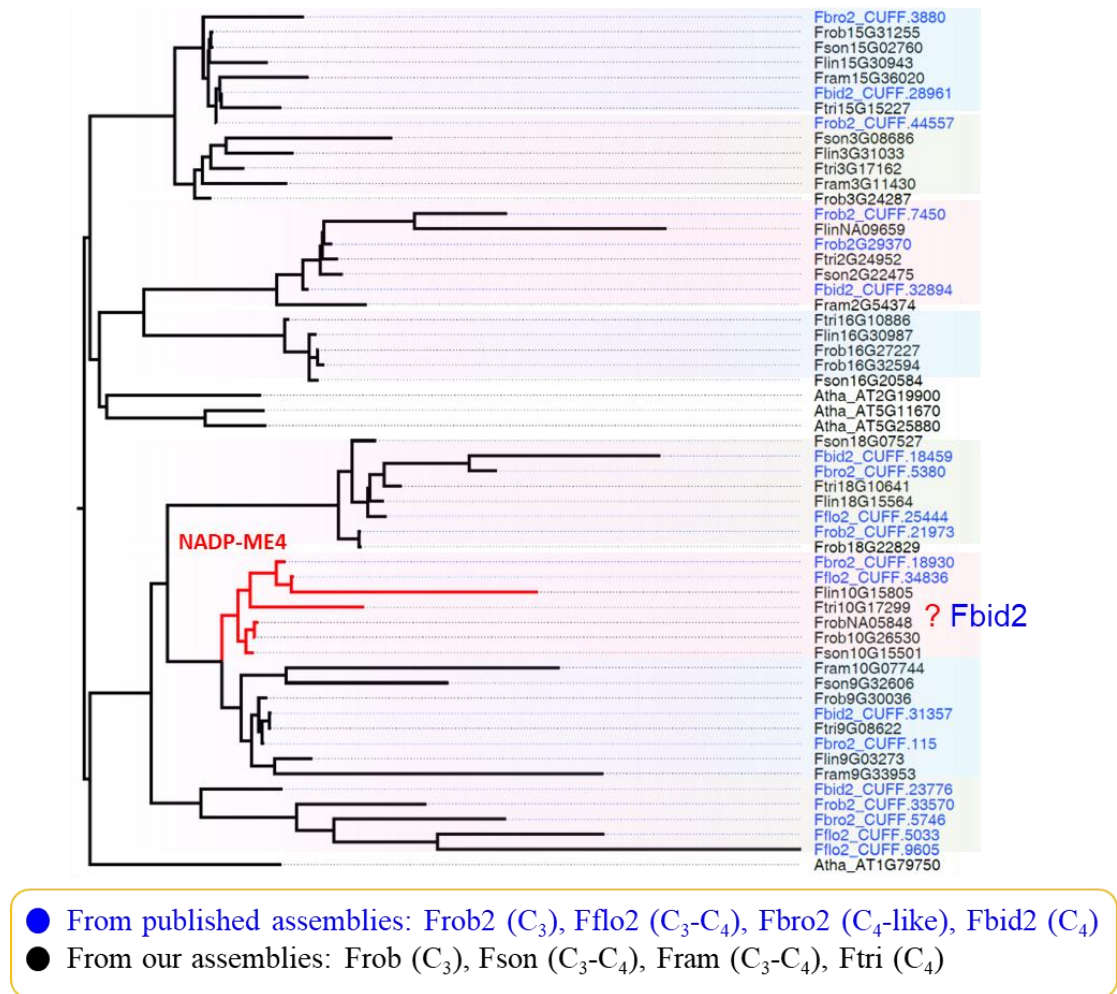

**Fig. S 5. The C<sub>4</sub> copies of CA1, PEPC1 and NADP-ME4 were not annotated in *F. bidentis* from published assembly**

The phylogenetic tree of *PEPC1* was constructed based on protein sequences. Sequences of Frob2, Fflo2, Fbro2 and Fbid2 (labeled in blue font on the gene tree) are from Taniguchi's assembly, those of Frob, Fson, Fram and Ftri (labeled in black font) are from our assembly. *PEPC1* was determined as C<sub>4</sub> version, which was not found in Fbid2, which may be a result of uncompleted assembly in this species (Abbreviations: Frob: *F. robusta*, Fflo: *F. floridana*; Fbro: *F. brownii*; Fbid: *F. bidentis*, Fson: *F. sonorensis*; Fram: *F. ramosissima*, Ftri: *F. trineriva*).

## 5. Determination of functional copies of C<sub>4</sub> genes

### Methods

To determine the functional copies of C<sub>4</sub> genes, or C<sub>4</sub> version of C<sub>4</sub> genes, orthologous groups of C<sub>4</sub> genes were first characterized using Orthofinder (v2.3.11)<sup>9</sup> with default parameters. The C<sub>4</sub> versions were determined by combining gene

phylogenetic tree and transcript abundances. To construct gene trees, protein sequences were aligned with MUSCLE (v3.8.31)<sup>10</sup> in default parameters, and Raxml (v7.9.3)<sup>11</sup> was applied to construct the gene tree based on the aligned protein sequences using the PROTGAMMAILG model (General Time Reversible amino acid substitution model with assumption that variations in sites follow gamma distribution). Transcript abundances were calculated based on RNA-seq data from a 4-week low CO<sub>2</sub> experiment.

## Results

As most C<sub>4</sub> genes belong to gene family with multiple paralogs both across both C<sub>3</sub> and C<sub>4</sub> species, the C<sub>4</sub> version of C<sub>4</sub> genes was determined using the following two criteria: 1) showing higher transcript abundance in C<sub>4</sub> than in C<sub>3</sub> species, and 2) higher transcript abundance among its paralogous group. The C<sub>4</sub> versions of C<sub>4</sub> genes show higher transcript abundance in C<sub>4</sub> species than in other species, and usually are the highest paralog copy in C<sub>4</sub> species (Fig. S 6). For these determined C<sub>4</sub> version of C<sub>4</sub> genes, the evolutionary pattern of the C<sub>4</sub> version of C<sub>4</sub> genes in transcript and protein abundances were consistent (Fig. S 7).

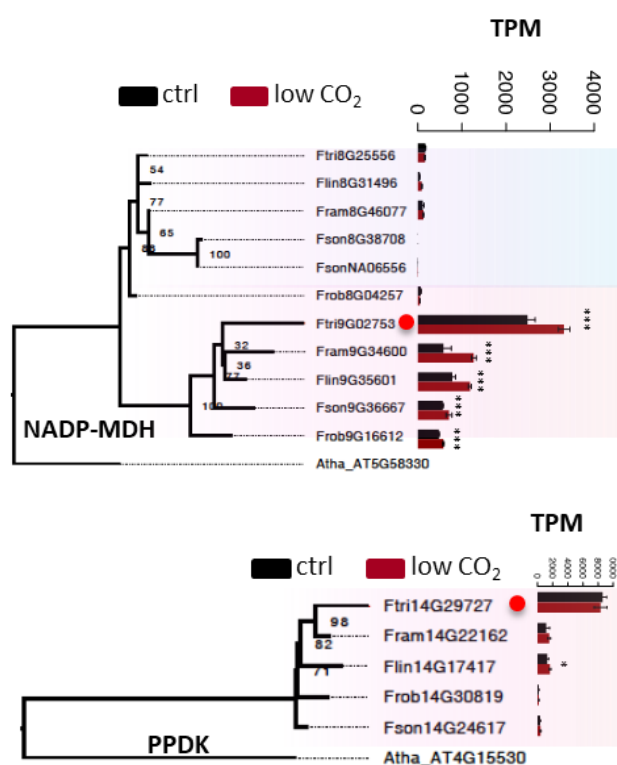

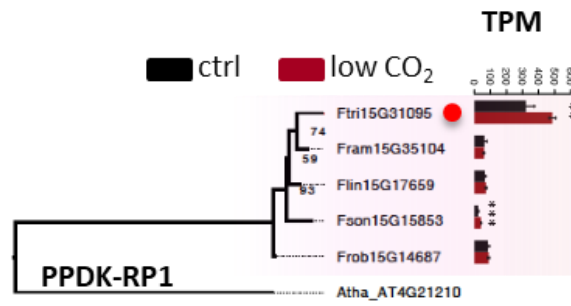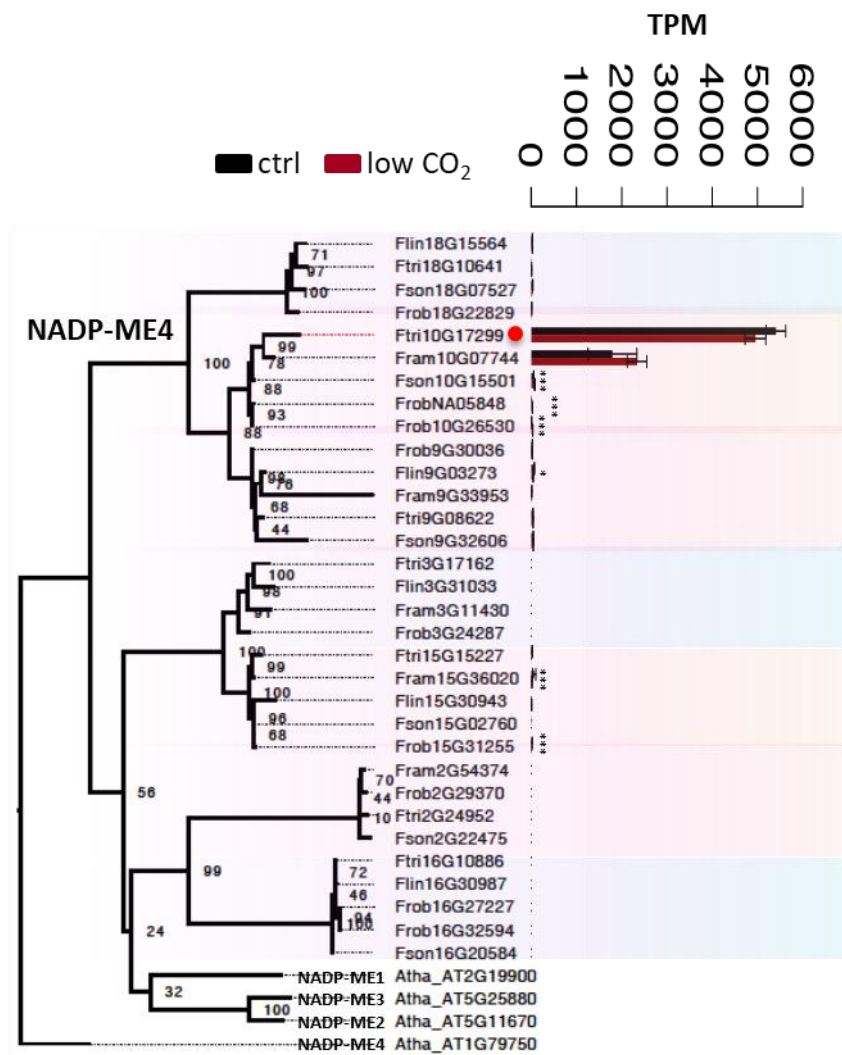

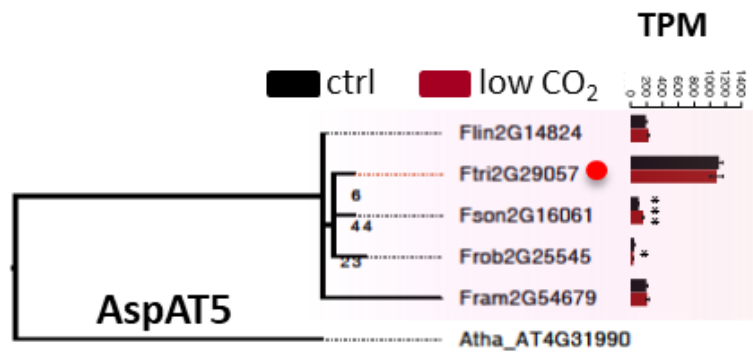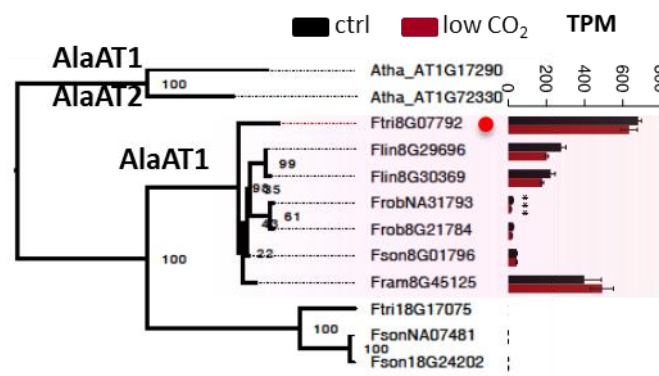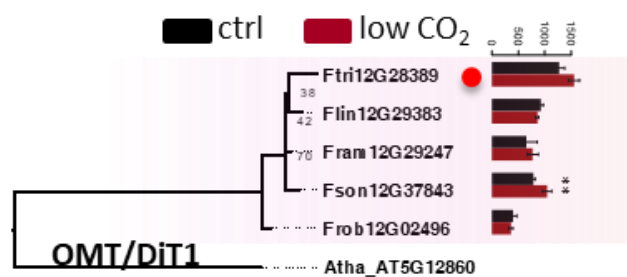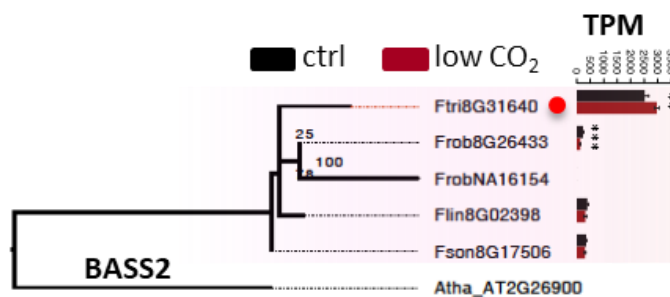

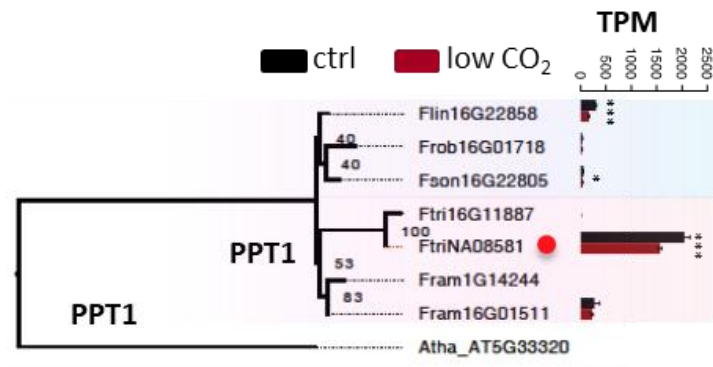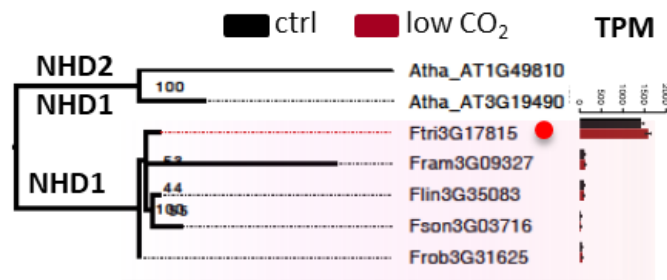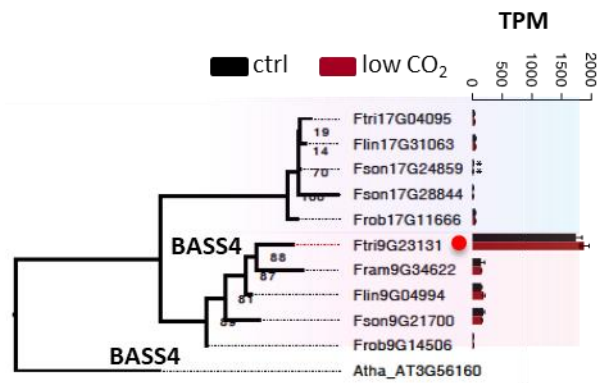

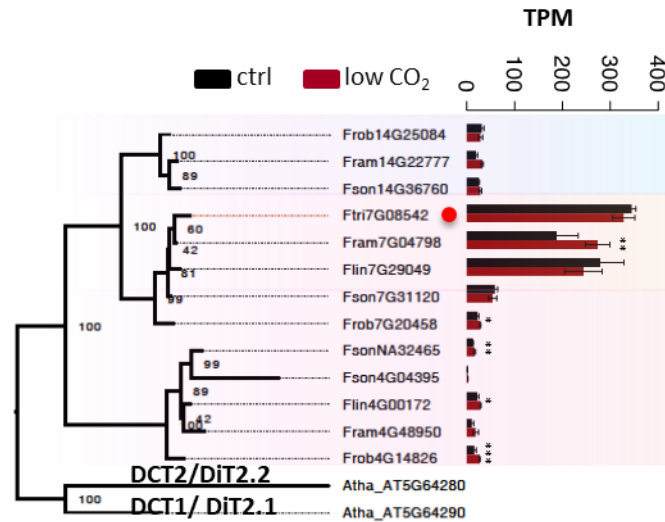

Fig. S 6. **Determining the C<sub>4</sub> version of C<sub>4</sub> genes combining gene tree and transcript abundances**

Gene tree and transcript abundances of each C<sub>4</sub> genes from 4-week low CO<sub>2</sub> experiment are shown. Genome-wide orthologous groups were predicted using Orthofinder. Gene trees were constructed using protein sequences from Raxml. Bootstraps were calculated from 100 independent trees. Gene expression in transcript per million mapped reads (TPM) is shown, where ctrl represents TPM of plant growing in normal CO<sub>2</sub> conditions (380 PPM) and low CO<sub>2</sub> represents TPM of plant growing in low CO<sub>2</sub> conditions (100 PPM) (n=3). Standard deviations are from three biological replicates. The predicted functional versions of C<sub>4</sub> genes are indicated with red circles.

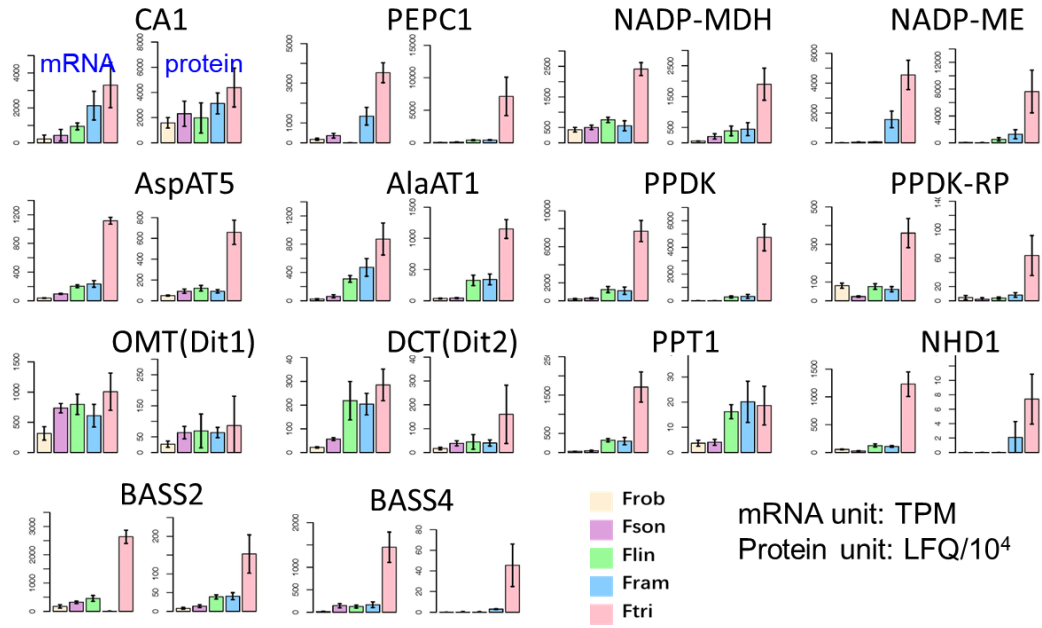

**Fig. S 7.  $C_4$  genes show a consistent evolutionary profile in transcript and protein abundances across the five *Flaveria* species**

Bar plots illustrate the transcript abundances (left) and protein abundances (right) of  $C_4$  enzyme and transporters from the five *Flaveria* species. The Y-axis represents transcript per million mapped reads (TPM) for transcript abundances and label free quantification (LFQ)/ $10^4$  for protein abundance (Abbreviations: TPM: transcript per million mapped reads, LFQ: label free quantification, *CA1*: carbonic anhydrase 1; *PEPC1*: phosphoenolpyruvate carboxylase 1; *NADP-MDH*: NADP-dependent malate dehydrogenase; *NADP-ME4*: NADP-dependent malic enzyme 4; *AspAT*: Aspartate amino acid transport; *AlaAT*: alanine aminotransferase; *PPDK*: pyruvate orthophosphate dikinase; *PPDK-RP*: PPDK regulatory protein; *OMT*: oxaloacetate/malate transporter or dicarboxylate transporter 1 (*DiT1*); *DCT*: dicarboxylate transport 2.1 (or *DiT2.1*); *PPT1*: phosphate/phosphoenolpyruvate translocator 1; *NHD1*: sodium: hydrogen antiporter 1; *BASS2*: bile acid sodium symporter 2; *BASS4*: bile acid sodium symporter 4; *PEPC kinase* (*PEPC-k*) was not included as the  $C_4$  version of *PEPC-k* was not detected in Fram;)

## 6. $C_4$ version of *PEPC-k* was absent in Fram plant sequenced in this study

### Methods

We found that the  $C_4$  version *PEPC-k* was absent in Fram (Fig. 1a). We checked whether this was due to an error in genome assembly. We investigated the presence and absence of adjacent genes to *PEPC-k* in all five *Flaveria* species. Specifically, we analyzed six genes upstream of *PEPC-k* and six genes downstream of *PEPC-k* according to the chromosome location of Frob (13 genes in total). We then checked

whether the orthologous genes were present in the other four *Flaveria* species.

## Results

We found that the counterparts of the 13 genes were also present in the C<sub>4</sub> species Ftri, while, one of the orthologous genes was absent in Fson. Notably, 7 genes in tandem were absent in the Flin genome, and 6 genes in tandem were absent in the Fram genome, including *PEPC-k* (Fig. S 8 a). This suggests that the genome segments containing *PEPC-k* were dynamic during the evolution in the genus of *Flaveria*. We then checked whether the deletion in Fram was due to an assembly gap. We found that the sequence is not “N”, suggesting that this may be not a gap (Fig. S 8 b and c). Therefore, our results suggested that the Fram plant sequenced here had a deletion of the C<sub>4</sub> version of *PEPC-k*.



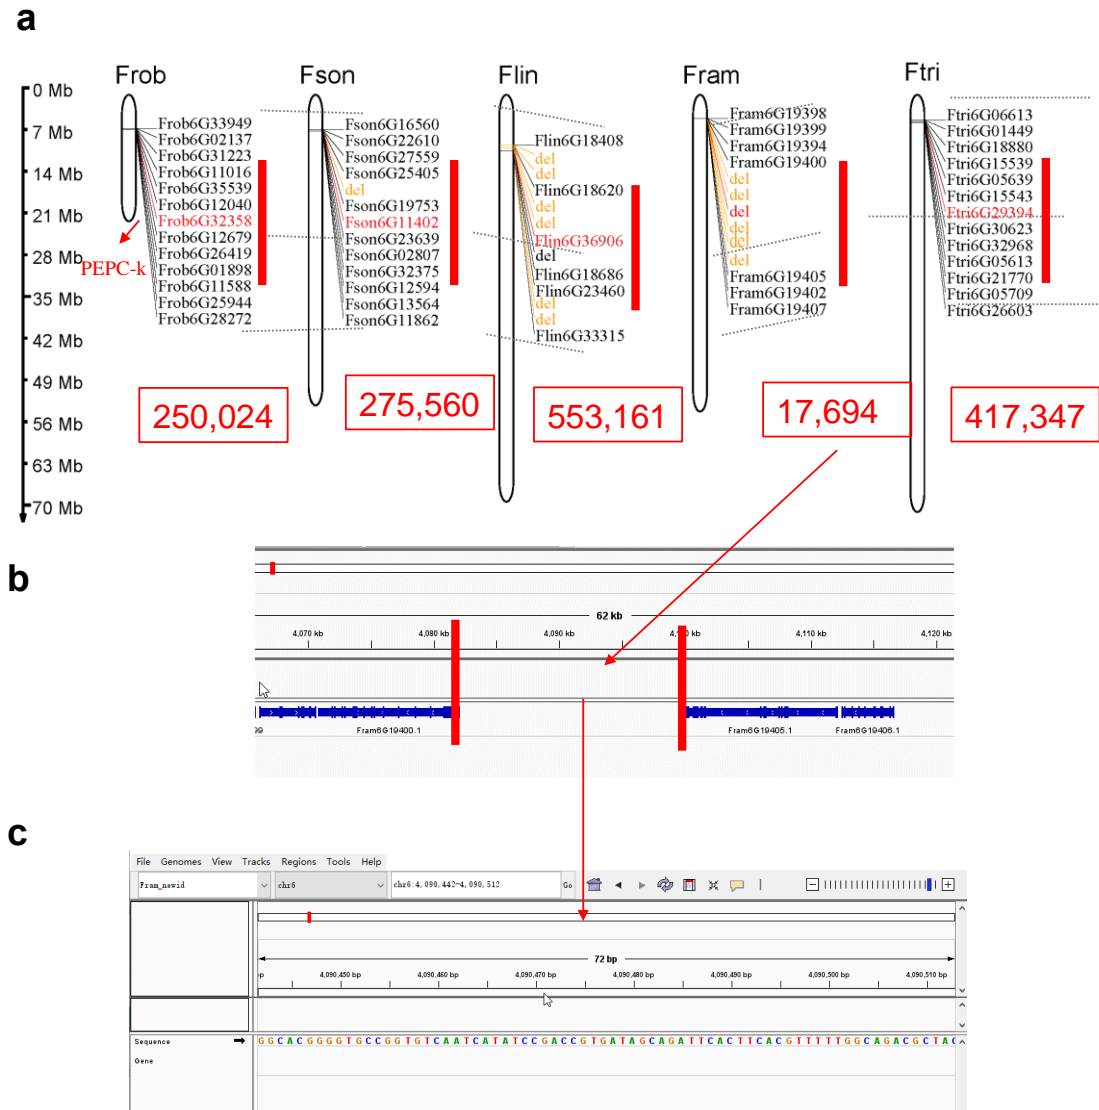

**Fig. S 8. Syntenic chromosome region containing *PEPC-k* across the five *Flaveria* species**  
 (a) The syntenic chromosome region containing *PEPC-k*. Six genes from upstream and downstream of *PEPC-k* according to Ftri are also shown. *PEPC-k* is labeled in red font, a deletion is represented by “del” in orange. The number in the red frame indicates the length of the chromosome segment. (b) IGV indicates the chromosome region of the deletion of the six genes (between Fram6G19400 and Fram6G19405, including *PEPC-k*) in Fram. (c) The nucleotide sequences between Fram6G19400 and Fram6G19405. Note that the sequence is not “N”, suggesting that the deletion is not due to an assembly gap.

## 7. Verification of three copies of *PEPC1* in the C<sub>4</sub> species Ftri

### Methods

To verify the presence of three copies of *PEPC1* in Ftri, genomic DNA was isolated from young leaves of one-month old plants. DNA isolation was performed as described previously <sup>12</sup>. Forward primers were designed to be complementary to the non-conserved region of the 5' UTR of the three *PEPC1* copies respectively, and the reverse primer was designed to be complementary the conserved region of the coding sequence. The forward primers were: TCGTATTTAATCTTTTCGCAGGTTTAAAAATATT for Ftri3G07887 (*PEPC1.1*), GCATTAGGTTTGAGATAGCCTG for Ftri3G16655 (*PEPC1.2*), and ACGGCAACGTGCGCATA for Ftri3G30452 (*PEPC1.3*). The reverse primer was identical for three loci: TATCCAAAAGCAAAGCATCATACTC.

### Results

The three copies of *PEPC1* in the C<sub>4</sub> species Ftri were verified by PCR. (Fig. S 9).

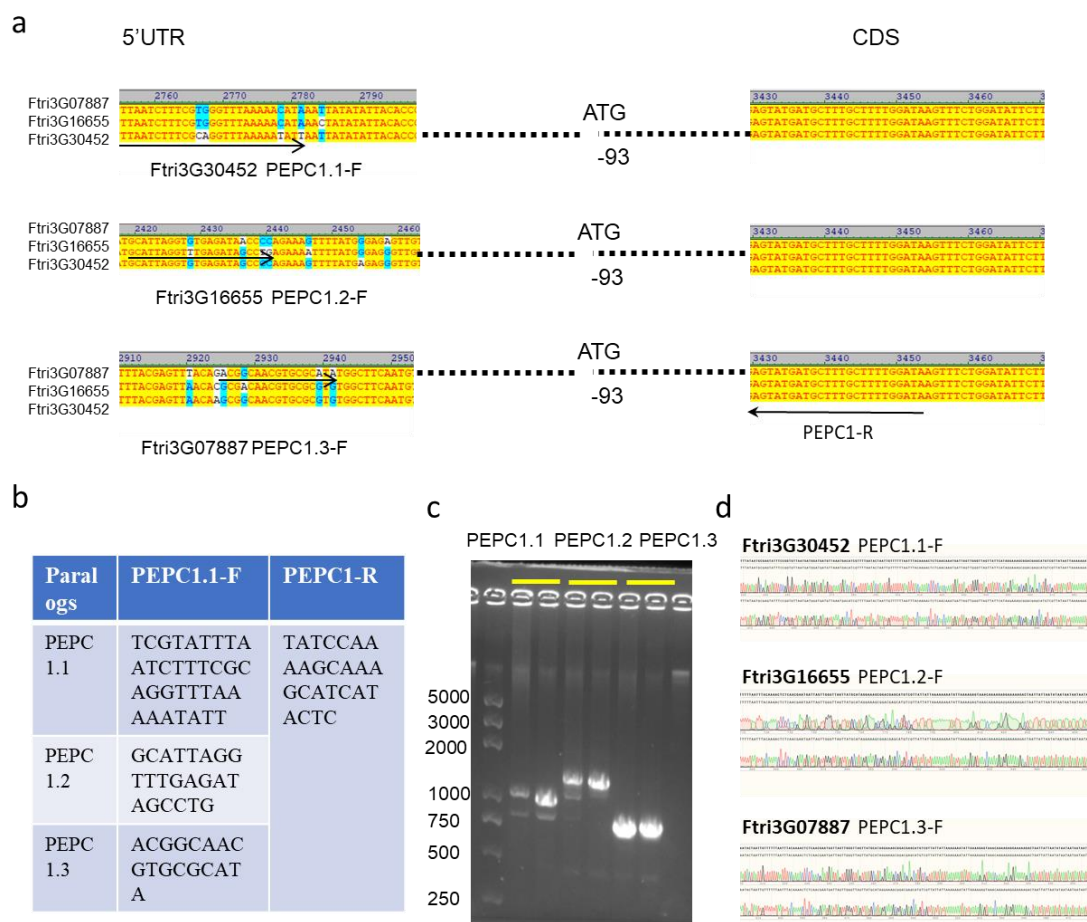

**Fig. S 9. Verification of three *PEPC1* paralogs in *Ftri* using PCR**

(a) Schematic of the designed forward and reverse primers of there *PEPC1*s in *Ftri*. The forward primers are complementary to the 5'UTR where the sequences are different between the three *PEPC1*s. The reverse primer is complementary to the conserved protein coding region. Primer sequences for each *PEPC1* paralog are shown in (b), gel results and Sanger sequencing are shown in (c) and (d).

## 8. Investigation of tandem duplications of C<sub>4</sub> genes in other C<sub>4</sub> species

### Methods

To investigate whether C<sub>4</sub> genes show tandem duplication in other C<sub>4</sub> species, we expanded the evolution of C<sub>4</sub> genes to more species. In total, two dicotyledonous C<sub>4</sub> species, *i.e.*, *Fttri* and *Gynandropsis gynandra* (Ggyn), and six monocotyledonous C<sub>4</sub> species, *i.e.*, *Zea mays* (V5), *Setaria viridis* (V2.1), *Panicum Hallii* (V2.1), *Sorghum bicolor* (v3.0.1), and *Miscanthus lutarioriparius* (V1) were included in the comparisons. Additionally, six dicotyledonous C<sub>3</sub> species and two monocotyledonous C<sub>3</sub> species, as well as one algal species (*Chlamydomonas reinhardtii*) were included. The protein sequences of those species were downloaded from public databases as mentioned in the Methods of the manuscript. Orthologous genes were predicted using Orthofinder (v2.3.11) <sup>9</sup> with default parameters, orthologous protein sequences were aligned by MUSCLE (v3.8.31) <sup>10</sup> with default parameters, and gene trees were constructed using Raxml (v7.9.3) <sup>11</sup> based on alignments of protein sequences with the PROTGAME model (General Time Reversible amino acid substitution model with assumption that variations in sites follow gamma distribution).

To investigate whether the same orthologous genes were co-opted in dicotyledonous and monocotyledonous C<sub>4</sub> species, we quantified transcript abundances of genes for all C<sub>4</sub> species (Fig. S 10 a) and several C<sub>3</sub> species, including *Oryza sativa*, *Arabidopsis thaliana*, *Tarenaya hassleriana*, and the algae species *Chlamydomonas reinhardtii*. The RNA-seq data used here are mentioned in Supplementary Note 14.

### Results

Our results indicated that tandem duplication of C<sub>4</sub> version of *CA*, *PEPC*, and *PEPC-k* were not universal but rather, species-specific (Fig. S 10). Notably, we found that the same orthologous genes were recruited for C<sub>4</sub> photosynthesis across different C<sub>4</sub> species. Remarkably, the counterparts of recruited C<sub>4</sub> genes already showed high transcript abundances in C<sub>3</sub> species.

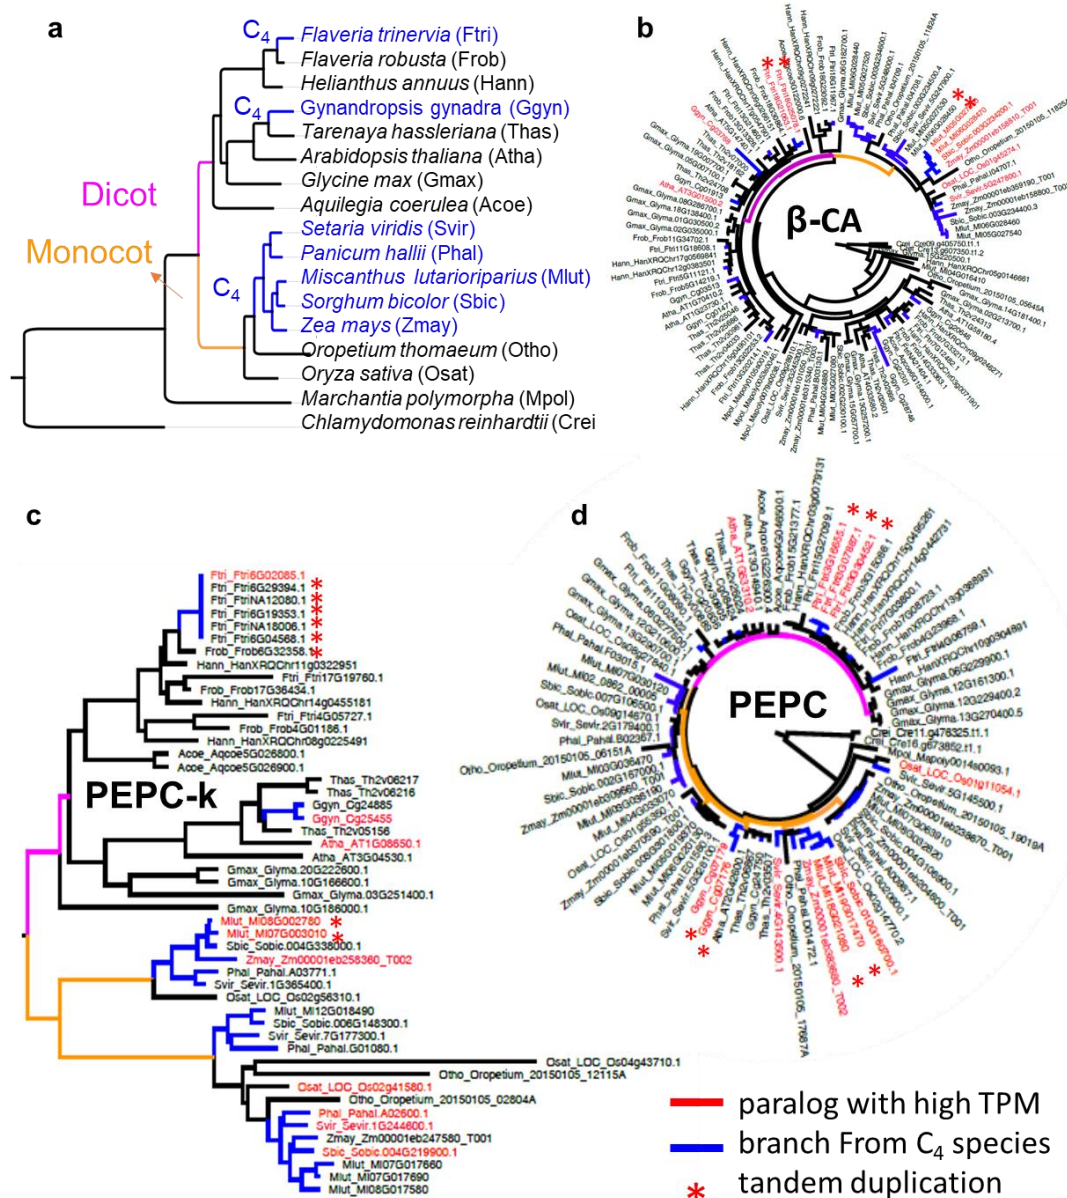

**Fig. S 10. Tandem duplications of C<sub>4</sub> version of CA, PEPC and PEPC-k are not universal but species-specific**

(a) Phylogenetic tree of species to investigate tandem duplication of C<sub>4</sub> genes. Phylogenetic relationships were inferred from the Phytozome website (<https://phytozome-next.jgi.doe.gov>). C<sub>4</sub> species are labeled in blue. Abbreviations of each species using in the following gene trees are shown in parentheses after each species. The gene trees of CA (b), PEPC-k (c), and PEPC (d) are shown, where the main branch of monocotyledonous plants are shown in orange with dicotyledonous plants in purple. Branches labeled in blue are C<sub>4</sub> species, the gene with the highest TPM is labeled in red font. The format of the gene on the gene tree is as follows: “abbreviation of species name” plus gene id jointed with “\_”.

## 9. Analysis of transposable elements and their effects on duplicated *FtriPEPCI*

### Methods

To predict transposable elements (TEs), entire genome sequences of the five *Flaveria* species were searched for repetitive sequences individually. A *de novo* repeat sequence library was obtained using RepeatModeler (RepeatModeler-Open-1.0.5) with the following parameters: RepeatModeler -database database\_name -engine ncbi -pa [int]. We then used RepeatMasker (RepeatMasker-Open-4.1.0) to search for similar TEs against the *de novo* library with the following parameters: RepeatMasker genome.fa -lib de\_novo\_library -nolow -no\_is -q -engine rmbblast -pa [int] -norna. Intact long terminal repeat retrotransposons (LTR-RTs) were identified using LTR\_FINDER (v1.07) <sup>13</sup> and LTRharvest (v1.5.10) <sup>14</sup> with default parameters. LTR\_Retrieve (v2.9.0) <sup>15</sup> was then used to merge the above results with the following parameters: LTR\_retriever -genome genome.fa -inharvest species.harvest.scn -infinder species.finder.scn -nonTGCA species.harvest.nonTGCA.scn. The insertion time of intact LTR-RT was obtained from LTR-Retrieve analysis.

### Results

Transposable elements (TEs) showed the highest abundance in the C<sub>4</sub> species, where they accounted for 82% of the total genome, followed by C<sub>3</sub>-C<sub>4</sub> species (from 65.6% to 71.8%), while the percentage in the C<sub>3</sub> species was 47.1% (Table S 5). In all five species, long terminal repeat retrotransposons (LTR-RTs) comprised the majority of the TEs, accounting for an average of 76% of the total TEs (from 42% to 91%). (Table S 6 and Table S 7). Flin and Fram had more evolutionary recent LTR-RTs than the other species (Fig. S 11). Compared to C<sub>3</sub> and intermediate species, C<sub>4</sub> species *Ftri* had a higher proportion of TEs at the whole genome scale.

We found that abundant retrotransposons were on the chromosomal regions between tandem duplicated *FtriCA1*, and the region between tandem duplicated *FtriPEPCI* and the region between tandem duplicated *FtriPEPC-K1* (Fig. S 12). In comparison, few retrotransposons were observed in the chromosome near the region

containing *FtriPPDK*, which was a single copy gene.

Reports have showed that gene duplications could be mediated by retrotransposons through retroposition<sup>16 17 18 19 20 21</sup>. To test whether the observed C<sub>4</sub> gene duplications were related to retrotransposons in *Ftri*, we took a close inspection of the evolution and sequences of *FtriPEPC1s*. Among the three *FtriPEPC1s*, *FtriPEPC1.1* was predicted to be the ancestral copy, as the mesophyll expression module 1 (MEM1) on the promoter of *FtriPEPC1.1* was conserved with that of *PEPC1* from other four *Flaveria* species, i.e., *Frob*, *Fson*, *Fram* and *Flin*, whereas, the MEM1 of *FtriPEPC1.2* and *FtriPEPC1.3* showed a deletion of 109 bps (Fig. S 13). Except for coding region, sequences from ~2500bp upstream and ~2000 bp downstream of the coding sequences of *FtriPEPC1s* were also conserved among the three *FtriPEPC1s* (Fig. S 14 b). Through close inspection of the sequences near the conserved region, we observed a 9-bp inverted repeat sequences, i.e., 5'-AAAATAAAG-3'. Besides, a 4-bp motif, i.e., 5'-TTTT-3', immediately flanked the invert repeats (Fig. S 14 c).

To further test whether retrotransposons were related to duplications of DNA segments, we examined chromosomal regions containing duplicated copies of *CA1*, *PEPC1* and *PEPC-k1* in *Ftri*. We found that these chromosomal regions contain many duplicated sequences (Fig. S 15). Taken together, our results suggest that the gene duplications of C<sub>4</sub> genes might be mediated by retrotransposons.

Table S 5. Compositions and proportions of transposable elements across the five *Flaveria* species

|                                 | Frob<br>(% of genome) | Fson<br>(% of genome) | Flin<br>(% of genome) | Fram<br>(% of genome) | Ftri<br>(% of genome) |
|---------------------------------|-----------------------|-----------------------|-----------------------|-----------------------|-----------------------|
| <b>Total Repeat Fractions</b>   | 47.09                 | 70.26                 | 71.81                 | 65.56                 | 82.06                 |
| <b>Class I :Retrotransposon</b> | 20.41                 | 57.27                 | 59.52                 | 56.29                 | 75.97                 |
| <b>LTR Retrotransposon</b>      |                       |                       |                       |                       |                       |
| Ty1/Copia                       | 12.69                 | 34.1                  | 27.32                 | 38.51                 | 56.6                  |
| Ty3/Gypsy                       | 5.97                  | 22.21                 | 29.44                 | 16.81                 | 18.48                 |
| Other                           | 1.18                  | 0.72                  | 0.66                  | 0.74                  | 0.32                  |
| <b>NON-LTR Retrotransposon</b>  |                       |                       |                       |                       |                       |
| SINE                            | 0.03                  | 0.02                  | 0.01                  | 0.01                  | 0                     |
| LINE                            | 0.54                  | 0.22                  | 2.09                  | 0.22                  | 0.57                  |
| <b>Class II :DNA transposon</b> | 6.23                  | 4.73                  | 5.1                   | 4.32                  | 1.84                  |
| CACTA                           | 0.82                  | 0.71                  | 1                     | 0.82                  | 0.37                  |
| Mutator                         | 0.45                  | 0.61                  | 1.48                  | 0.39                  | 0.23                  |
| PIF-Harbinger                   | 0.27                  | 0.31                  | 0.27                  | 0.11                  | 0.1                   |
| RC/Helitron                     | 0.4                   | 0.64                  | 0.25                  | 0.2                   | 0.11                  |
| hAT                             | 2.21                  | 1.62                  | 0.77                  | 0.88                  | 0.6                   |
| Other                           | 2.08                  | 0.84                  | 1.33                  | 1.92                  | 0.43                  |
| <b>Tandem Repeat</b>            | 0.38                  | 0.86                  | 1.86                  | 0.45                  | 0.31                  |
| <b>Unknown</b>                  | 20.07                 | 7.4                   | 5.33                  | 4.5                   | 3.94                  |

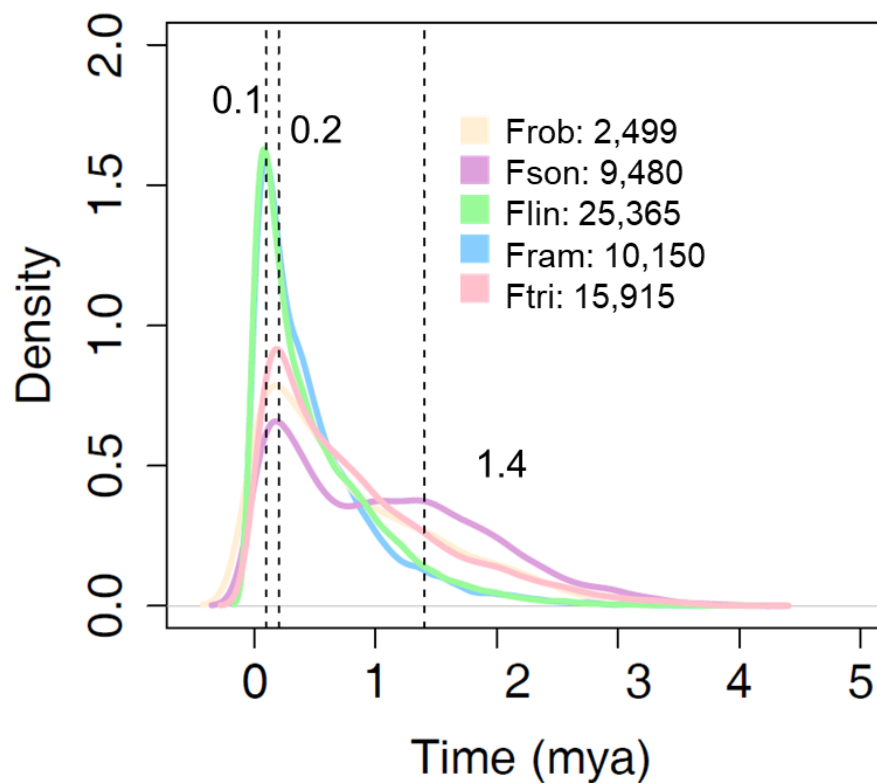

Fig. S 11. The burst time of LTR-RTs estimated based on intact LTR-RTs

The distribution of burst time of the contact LTR-RTs of the five *Flaveria* species are shown. The numbers of contact LTR-RTs for each species are indicated. (Abbreviations of species:



Frob, *F. robusta*, Fson, *F. sonorensis*, Flin: *F. linearis*, Fram: *F. ramosissima*, Ftri: *F. trinervia*.)

Table S 6. The length of different types of transposon elements

| Species                                       | Total TE length (Mbp) | Total LTR-RT length (Mbp) | Total intact LTR-RT length (Mbp) | % Intact LTR-TR to TE | % Intact LTR-RT to LTR-RT |
|-----------------------------------------------|-----------------------|---------------------------|----------------------------------|-----------------------|---------------------------|
| <b>Frob</b> (C <sub>3</sub> )                 | 259.73                | 109.42                    | 14.68                            | 5.65%                 | 13.42%                    |
| <b>Fson</b> (C <sub>3</sub> -C <sub>4</sub> ) | 872.90                | 708.48                    | 80.89                            | 9.27%                 | 11.42%                    |
| <b>Flin</b> (C <sub>3</sub> -C <sub>4</sub> ) | 1188.64               | 950.59                    | 236.96                           | 19.94%                | 24.93%                    |
| <b>Fram</b> (C <sub>3</sub> -C <sub>4</sub> ) | 830.21                | 709.81                    | 101.38                           | 12.21%                | 14.28%                    |
| <b>Ftri</b> (C <sub>4</sub> )                 | 1480.09               | 1357.84                   | 168.89                           | 11.41%                | 12.44%                    |

Note: LTR-RT: long terminal repeat retrotransposons, TE: transposon elements

Table S 7. The different types of TEs

| Species                                       | TE        | LTR-RT  | Intact LTR-RT | % Intact LTR-RT to TE | % Intact LTR-RT to LTR-RT |
|-----------------------------------------------|-----------|---------|---------------|-----------------------|---------------------------|
| <b>Frob</b> (C <sub>3</sub> )                 | 571,290   | 129,171 | 2,499         | 0.44%                 | 1.93%                     |
| <b>Fson</b> (C <sub>3</sub> -C <sub>4</sub> ) | 985,595   | 532,042 | 9,480         | 0.96%                 | 1.78%                     |
| <b>Flin</b> (C <sub>3</sub> -C <sub>4</sub> ) | 1,298,249 | 767,238 | 25,365        | 1.95%                 | 3.31%                     |
| <b>Fram</b> (C <sub>3</sub> -C <sub>4</sub> ) | 747,356   | 371,205 | 10,150        | 1.36%                 | 2.73%                     |
| <b>Ftri</b> (C <sub>4</sub> )                 | 1,045,859 | 687,601 | 15,915        | 1.52%                 | 2.31%                     |

Note: LTR-RT: long terminal repeat retrotransposons, TE: transposon elements

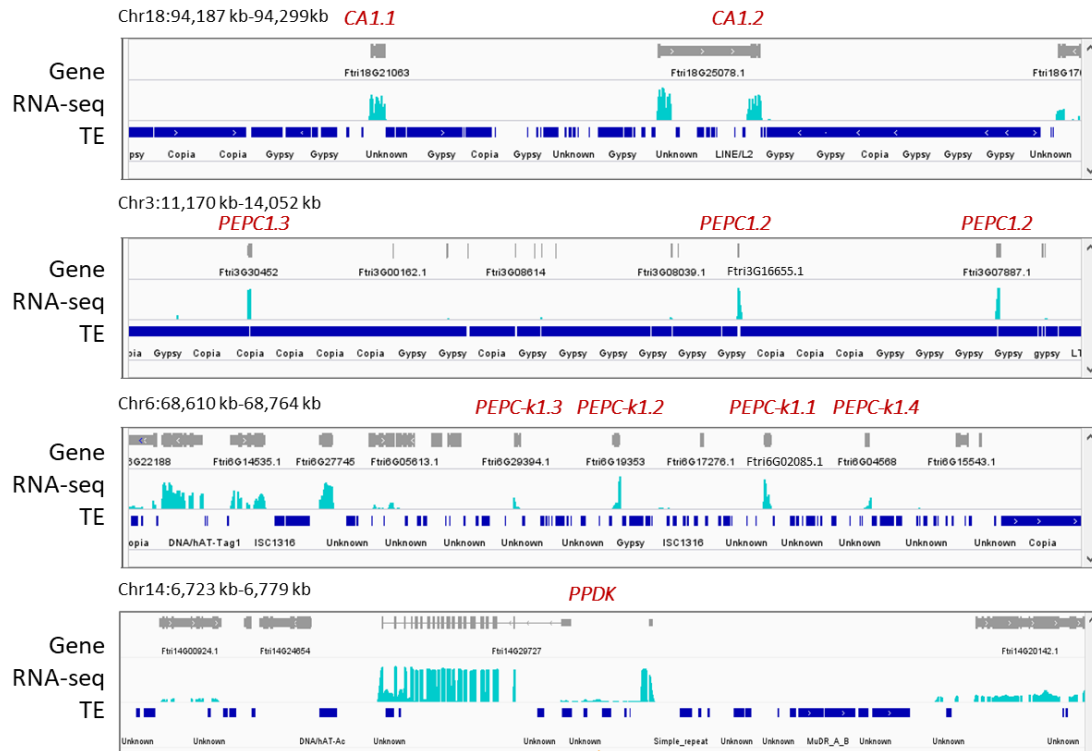

**Fig. S 12. Retrotransposons may be related to tandem duplication of *CA1*, *PEPC1* and *PEPC-k1* in *Ftri*.**

Integrative genomics viewer (IGV) indicating the genes, transcript abundances and predicted TEs on the chromosomal regions between tandem-duplicated *CA1*, *PEPC1* and *PEPC-k1*.

Transcript abundances are shown in transcript per million mapped reads (TPM). The chromosome region containing *PPDK* is also illustrated (bottom panel). (Abbreviations: *CA1*, carbonic anhydrase 1; *PEPC1*, phosphoenolpyruvate carboxylase 1; *PEPC-K*, *PEPC* kinase; *PPDK*, pyruvate/orthophosphate dikinase.)

**Ftri3G16655 (1.1)** -1697 TATTGAGACTATATTAATGTGGTTGATATCATGTGAATTTATGAAAACTTGTGAAAAA  
 Ftri3G07887 (1.2) -1436 TATTGAGACTATATTTCTGTGGTTGAAATCATGTGAATTTATG-----  
**Ftri3G30452 (1.3)** -1592 TATTGAGACTATATTTCTATGGTTGAAATCATGTGAATTTATG-----  
 FlinNA39315 -3781 TATTGAGACTATATTTTTGTGGTTGAAATCATATGAATTTATGAAAACTCGTGAAAAATA  
 Fram3G09579 -2486 TATTGAGACTATATTTTTGTGGTTGAAATCATGTGAATTTATGAAAACTTGTGAAAAA  
 Frob3G15086 -1725 TATTGAGACTATATTTTTGTGGTTGAAATCATATGAATTTATGAAAACTCATGAAGAAA  
 Fson3G09193 -3515 TATTGAGACTATATTTTTGTGGTTGAAATGATATGATTTTATGAAAACTCGTGAAAAA  
 \*\*\*\*\* \* \*\*\*\* \* \* \* \* \* \*\*\* \*\*\*\*\* MEM1 A submodule

**Ftri3G16655 (1.1)** TTAATTGGACAGAGGAAATCAAAAACAAAATTGGATCTTTCATAT-CACGAAAAGGCAG  
 Ftri3G07887 (1.2) -----  
**Ftri3G30452 (1.3)** -----  
 FlinNA39315 TTGAATTAGAAAGAGGAAATAGAAAGCAAAGTTGGATCTTTCATATCCACGAAAAGACAT  
 Fram3G09579 TTAATTGGAAAGAGGAAATAGAAAGCAAAGTTGGATCTTTCATAT-CACGAAAAGGCAT  
 Frob3G15086 TTGAATTAGAAAGAGGAAATAGAAAGCAAAGTTGGATCTTTCATAT-CACGAAAAGGCAT  
 Fson3G09193 TTGAATTGGAAAGAGGAAATAGAAAGCAAAGTTGGATCTTTCATAT-CACGAAAAGGCAT

**Ftri3G16655 (1.1)** TAGTTCTTGCCACTTGACCAAGGAGTGTTTCGTAGAGCCGTACTTACTCACTAAAACAAAC  
 Ftri3G07887 (1.2) -----AGAGCCATACTTAGTCTCTAAAACAAAC  
**Ftri3G30452 (1.3)** -----AGAGCTGTACTTACTCACTAAAACAAAC  
 FlinNA39315 GA--TTTTGCCACTTGACCAAGGAGTGTTTCGTAGAGCCGTACTGACTCACTAAAACAAAC  
 Fram3G09579 GAATTCTTGCCACTTGACCAAGGAGTGTTTCGTAGAGCCGTACTTACTCACTAAAACAAAC  
 Frob3G15086 GAGTTCTTGCCACTTGACCAAGGAGTGTTTCGTAGAGCCGT-CTTACTCACTAAAACAAAC  
 Fson3G09193 GAGTTCTTGCCACTTGACCAAGGAGTGTTTCGTAGAGCCGTACTTACTCACTAAAACAAAC  
 \*\*\*\*\* \* \* \* \* \* \*\*\*\*\* MEM1 B submodule

note: **Ftri3G16655**: ancestral copy; **Ftri3G30452**: reported copy.

Fig. S 13. The Mesophyll expression module 1 in the three *FtriPEPC1s*

The mesophyll expression module 1 (MEM1) sequences of the *PEPC1* promoters from five *Flaveria* species. The A and B submodules are highlighted in red boxes. Asterisks show identical nucleotides across the two modules. Pink zones indicate single nucleotide difference in the A submodule, and the required tetranucleotide CACT in the B submodule. In *Ftri*, *Ftri3G1665* (*PEPC1.1*) is the ancestral copy and the other two are latterly duplicated. The duplicated *PEPC1s* show a segment of deletion between A submodule and B submodule. (Abbreviations: MEM: mesophyll expression module, which is required for the mesophyll highly expression of *PEPC* in *Flaveria* C<sub>4</sub> species as reported in a previous study <sup>22</sup>)

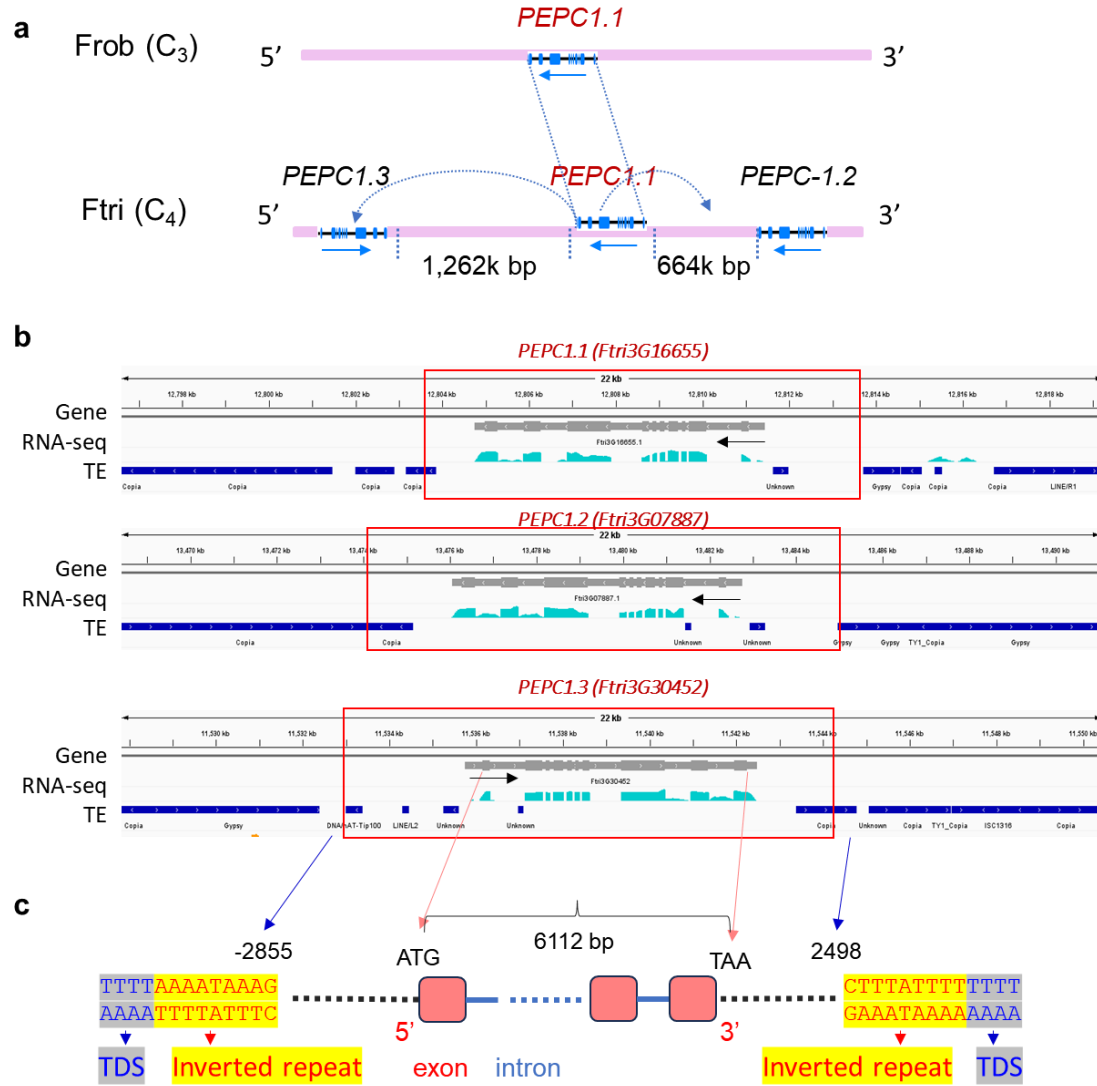

**Fig. S 14. Tandem duplicated FtriPEPC1s may be mediated by retrotransposons**  
 (a) Schematic illustration of the transposition of FtriPEPC1. (b) Integrative genomics viewer (IGV) indicating genes, transcript abundances and predicted TEs on the chromosomal regions near three FtriPEPC1s. The conserved regions of the three FtriPEPC1s were shown in red frame. (c) Inverted repeats (red font in yellow background) were observed adjacent to the conserved region of FtriPEPC1.3. A 4-bp motif (blue font in grey background) flanks the inverted repeats, resembling a target site duplication (TSD) in transposition event mediated by retrotransposons.

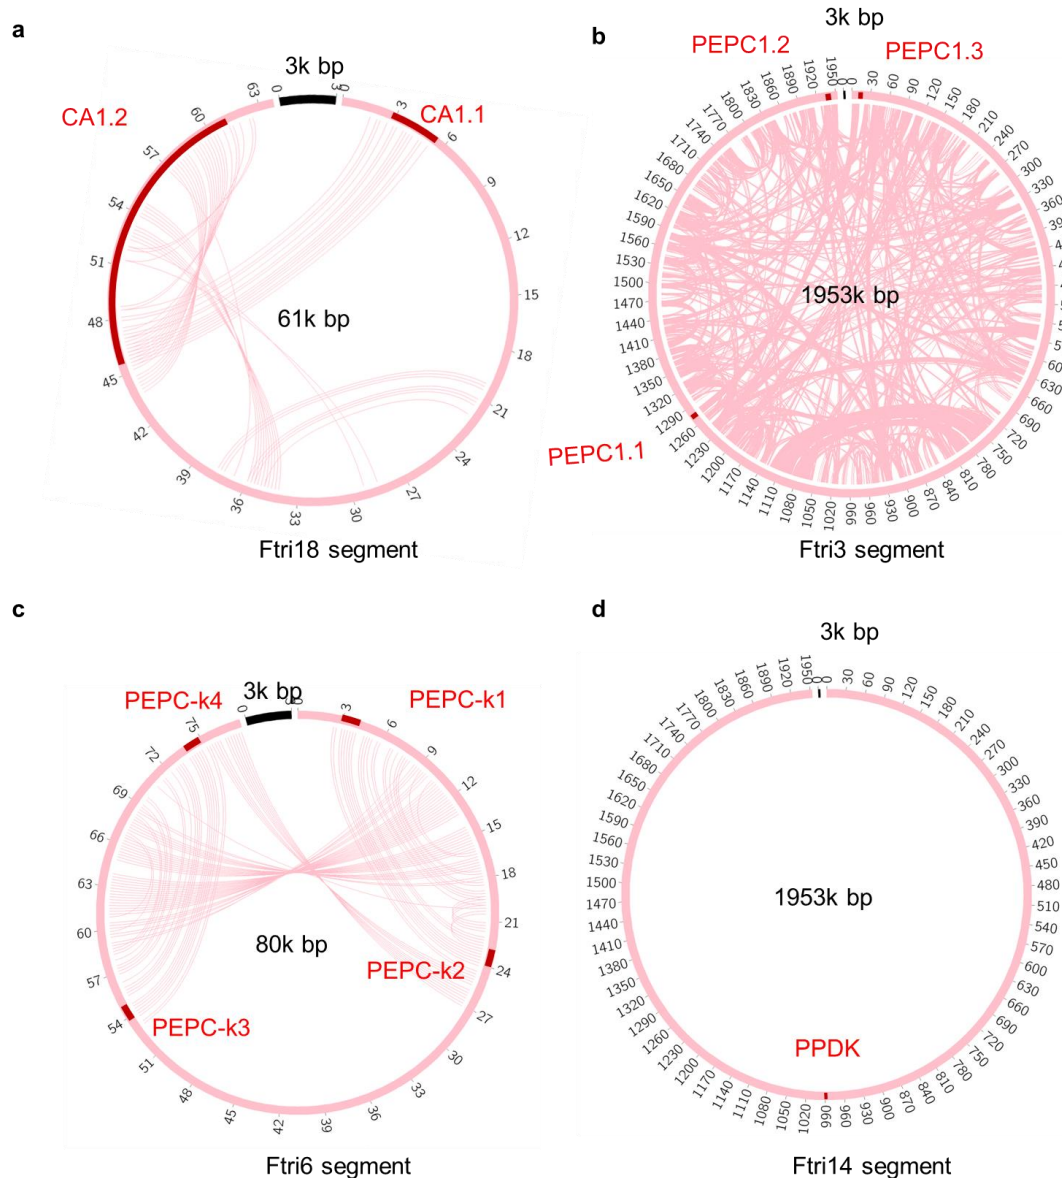

**Fig. S 15. Chromosome segments containing tandem duplicated *C<sub>4</sub>* gene copies in Ftri**  
The chromosome segment containing tandem duplicated *CA1*(a), *PEPC1* (b) and *PEPC-k1* (c) in Ftri. The lengths of shown chromosome segments were as indicated in the circles. (d) The chromosome segment containing *PPDK* in Ftri, which showed a length of 1953k bp of chromosome 14. We used a length of 1953kbp to compare against chromosomal segment on chromosome 13 containing three *PEPC1*s in (b). The 3kbp region in black is used as a scale of the chromosome segment size. Lines inside the circles represent duplicated segments with 200bp. Note that abundant duplicated sequences were observed in the chromosome regions containing duplicated paralogs of *CA1*, *PEPC1* and *PEPC-k1*, but not in the chromosome region containing *PPDK*, which is a singleton gene.

## 10. Prediction of *cis*-regulatory elements using ATAC-seq

### Methods

Nucleic isolation, library construction sequencing, peaks calling and Tn5 hypersensitive site (THS) were illustrated in the Methods of the manuscript.

### Results

Approximately 30% ATAC-seq raw reads were uniquely mapped to the genome sequences of Ftri. A high Pearson correlation was reported between two independent biological replicates of ATAC-seq mapping. Around 80% of mapped reads were distributed in the intergenic region, and comparable proportions of mapped reads, *i.e.*, ~5%, were distributed in the 3k bps upstream, 3k bps downstream of genes and exon regions (Fig. S 16). Predicted THS of C<sub>4</sub> genes were predicted and illustrated in Fig. S 17.

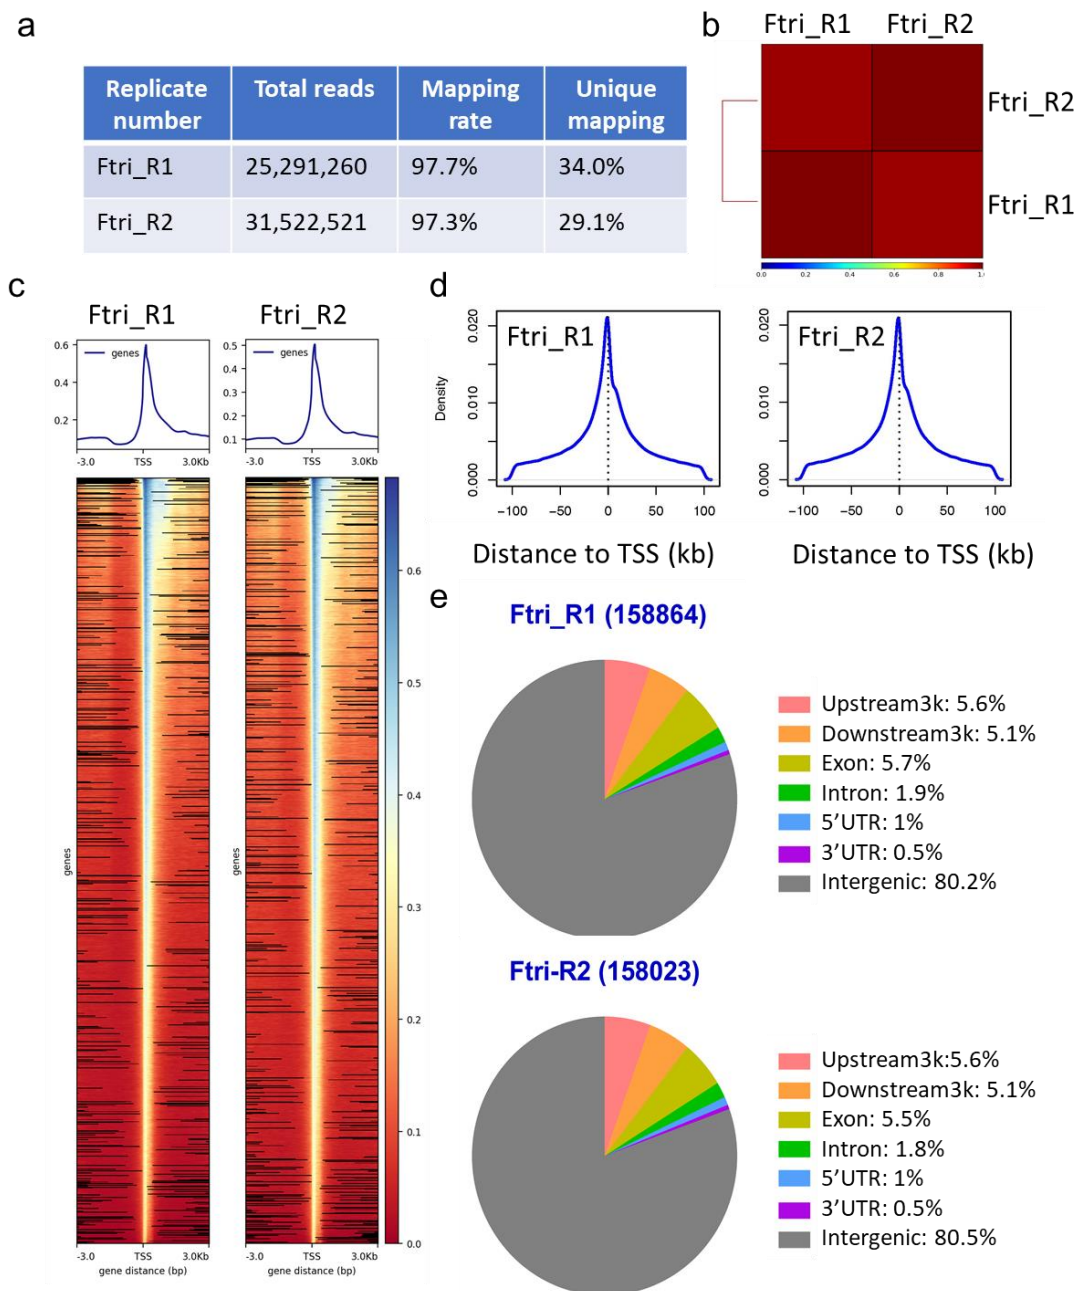

**Fig. S 16. Statistics of ATAC-seq mapping and THS calling**

(a) Table showing the total reads and mapping rates of two biological replicates. (b) Pearson correlation of reads mapping profiles of the two biological replicates. (c) Heatmaps showing the distribution of predicted Tn5 hyper sensitive site (THS) from 3k bps upstream and downstream of the transcript start site respectively. (d) The distribution of predicted THS from 100 kbps upstream and downstream of the transcript start site respectively. (e) Pie charts showing the relative locations of THS to genes. (Abbreviations: ATAC-seq: transposase-accessible chromatin using sequencing; THS: Tn5 hyper sensitive site; TSS: transcript start site.)



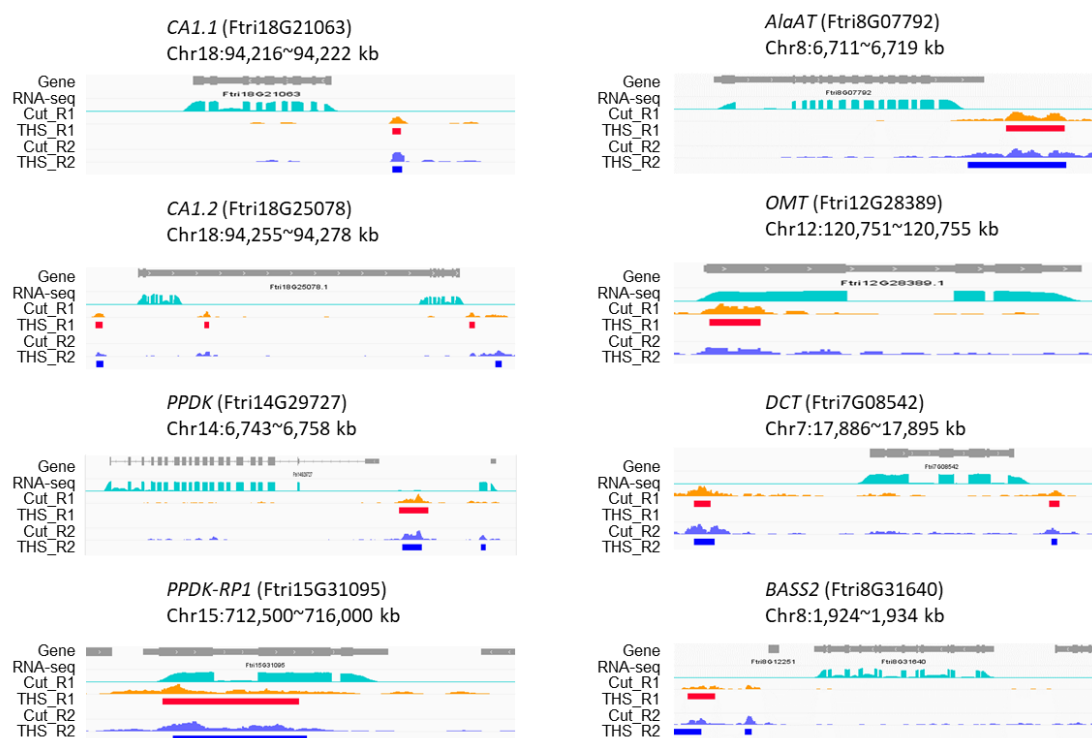

Fig. S 17. **Predicted Tn5 hypersensitive sites associated with C<sub>4</sub> genes in the C<sub>4</sub> species Ftri**

Integrated Genome Viewer (IGV) of RNA-seq reads and ATAC-seq reads of C<sub>4</sub> genes anchored to chromosomes in Ftri. Tn5 cuts and transposase hypersensitive sites (THS) from two biological replicates are shown.

## 11. ERF *cis*-regulatory elements were abundant in photosynthesis related genes of different C<sub>3</sub> species

### Methods

ATAC-seq data of *Zea mays* mesophyll cell and bundle sheath cells were obtained from a previous study<sup>23</sup>. The data of TF binding sites (TFBS) of *Zea mays*, *Setaria italica* and *Sorghum bicolor* were from a prior study<sup>24</sup>. To investigate the enriched CREs of C<sub>4</sub> genes in the C<sub>4</sub> species Ftri, the promoter region (3k bps upstream of the start codon) of C<sub>4</sub> genes were compared with the rest of the genes using findMotifsGenome.pl within HOMER<sup>25</sup> (v4.11.1) with default parameters.

### Results

ERF CREs were also the most abundant CREs in *Zea mays* (corn), *Setaria italica*



and *Sorghum bicolor* (Fig. S 18 and Fig. S 19).

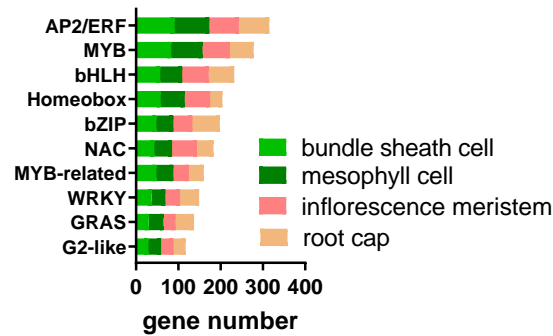

**Fig. S 18. A large number of ERF TFs show positive chromatin accessibility in different tissues of *Zea mays***

Bar plots showing the profiles of chromatin accessibility of TFs from different types of tissues in *Zea mays*. The top ten TFs with the greatest number of genes showing chromatin accessibility are shown here. A large number of ERF TFs show positive chromatin accessibility in different tissues, especially in the mesophyll and bundle sheath. TF frequency data used for drawing this bar plot are from a previous study<sup>23</sup> which are based on single cell ATAC-seq. (Abbreviations: MC: mesophyll cell; BSC: bundle sheath cell.)

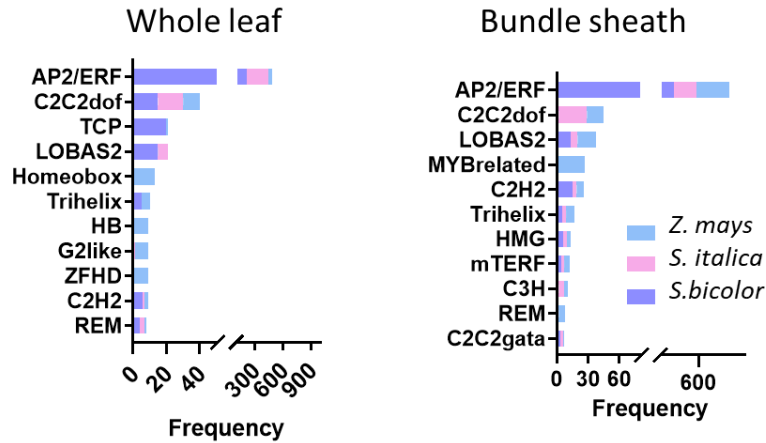

Fig. S 19. **ERF TF binding sites are abundant in photosynthesis related genes**

Bar plots showing the frequency of different TF binding site (TFBS) in photosynthesis related genes in the chromosome regions of the three  $C_4$  species, i.e., *Zea mays* (*Z. mays*), *Setaria italica* (*S. italica*) and *Sorghum bicolor* (*S. bicolor*). Photosynthesis related genes include genes in  $C_4$  pathway, photorespiratory pathway and Calvin-Benson-Bassham cycle. The top 10 most frequently known TFBS are showed. The data of TFBS used for drawing bar plots here are from a previous study <sup>24</sup>, in which the chromosome open regions were computed based on DNase-seq.

## 12. Construction of gene regulatory networks

### Methods

We constructed genome-wide co-regulatory networks (GRNs) for each of the five *Flaveria* species, which based on the gene expression profiles of at least 18 RNA-seq datasets either from a previous work <sup>26</sup> (for Frob, Fson, Fram and Ftri) or generated in the current study (for Flin) (Table S 8). The GRNs were constructed following a previously decribed method <sup>26</sup>. Specifically, genome-wide gene regulatory networks (GRNs) of five *Flaveria* species were constructed independently through application of the CMIP software package <sup>27</sup>. The CMIP package implements a path consistency algorithm based on the conditional mutual information which is specifically designed to predict direct regulation between genes <sup>28</sup>. Based on the gene expression table (the only input), the method generates a zero-order network by computing mutual information (MI), and indirect relationships were removed considering the CMI, which resulted in a first-order network. We implemented a *P*-value determination in

the CMIP package based on a permutation test. Specifically, we shuffled the expression level of each gene 2000 times, generating 2,000 null datasets. Thereafter, the *P*-value was defined as the ratio of number of null datasets to 2000 whose CMI values were higher than that calculated from the original dataset. Here, a *P*-value of 0.001 was used as the cutoff. The C<sub>4</sub>GRN was obtained by retaining the GRN of the C<sub>4</sub> genes and their co-regulated TFs (thereafter, C<sub>4</sub>TFs) from the genome-wide GRN.

In the original CMIP package, the cutoff of gene-gene partial Pearson correlation coefficient (PCC) was estimated as the inflection point of the exponential-function-fitted curve with the relationship between edge number and PCC values <sup>27</sup>. Considering that we mainly focused on the C<sub>4</sub>GRN, we revised this computational procedure to determine the proper PCC. Specifically, we compared the relative abundance of all TF families (TF frequency) of the C<sub>4</sub>GRN obtained using different PCC cutoffs, increasing from 0.1 to 0.9 with a step size of 0.1. We found that the TF frequency maintained a high degree of similarity under different PCC cutoffs ranging from 0.1 to 0.7 (Fig. S 20). We found that a PCC of 0.5 represented the inflection point in the curve of relationship between edge number of C<sub>4</sub>GRNs and PCC cutoffs (Fig. S 21). We thus selected 0.5 to be the PCC cutoff for GRN construction.

## Results

We constructed a genome-wide co-regulatory network (GRN) of the five *Flaveria* species based on the gene expression profiles of at least 18 RNA-seq datasets either from a previous work <sup>26</sup> or generated in the current study (Table S 8).

Previously, we constructed C<sub>4</sub>GRN for Frob, Fson, Fram and Ftri using the same RNA-seq datasets, whereas genes were annotated based on the transcript of Fram <sup>26</sup> (transcriptome-based C<sub>4</sub>GRN). We compared the C<sub>4</sub>GRN constructed here (genome-based C<sub>4</sub>GRN) with transcriptome-based C<sub>4</sub>GRN for the four species. The total gene number and TFs were enhanced due to the improved gene annotations, which resulted in increased C<sub>4</sub>TFs across all the species (Fig. S 23 a), nevertheless, the trends of the number of C<sub>4</sub>TFs along evolution (from C<sub>3</sub> to C<sub>4</sub>) were consistent between the two

studies<sup>26</sup>. The updated C<sub>4</sub>GRN demonstrated that 1/3 C<sub>4</sub>TFs were species specific, which was lower than the transcriptome-based C<sub>4</sub>GRN (Fig. S 23 b and c), but still consistent with previous report<sup>26</sup> that a large number of TFs were species specific. In addition, among the top 20 TF families with the greatest number of C<sub>4</sub>TFs, 15 of them were common across the two studies (Fig. S 23 d and e). On the other hand, the genome-based GRNs were improved as following (1) with the genome annotation, we improved the annotation of TFs for the five *Flaveria* species sequenced here, (2) combined with *cis*-elements information, we filtered out C<sub>4</sub> genes co-regulated TFs with no predicted cognate *cis*-regulatory elements on the promoter. These improvements enabled us to find out that ERF TFs were more abundant in C<sub>4</sub>GRNs in the C<sub>4</sub> species than in other species (Fig. S5 in the manuscript). Moreover, the gene structure annotation enabled us to uncover that intronless ERF TFs were abundant in C<sub>4</sub>GRNs of the C<sub>4</sub> species, which can not be figured out based on the previously general GRNs (Fig. S5 in the manuscript).

While the total number of ERF were comparable in all the five *Flaveria* species, C<sub>4</sub>GRN of the C<sub>4</sub> species Ftri showed more ERF TFs than those in other *Flaveria* species (Fig. S 22), specifically, 27 ERF TFs were predicted in Ftri C<sub>4</sub>GRN (Fig. S6 c in the manuscript) compared to 11 in Frob C<sub>4</sub>GRN (Fig. S 24 a). When only one copy of *CA1*, *PEPCI* and *PEPC-k* were analyzed for C<sub>4</sub>GRN in the C<sub>4</sub> species Ftri, 22 ERF TFs were co-regulated with 13 C<sub>4</sub> genes (Fig. S 24 b).

We examined how many of the counterparts of the 27 C<sub>4</sub> ERF TFs in the C<sub>3</sub> species Ftri also regulated the counterparts of C<sub>4</sub> genes in the C<sub>3</sub> species Frob, and the results showed the number was four (Table S 9), suggesting that most C<sub>4</sub> ERF TFs were recruited to regulate C<sub>4</sub> genes in the later stage of C<sub>4</sub> evolution, which is consistent with our earlier study<sup>29</sup>.

Next, we examined how many of the shared TF between Ftri and Zmay co-regulate C<sub>4</sub> orthologous genes in dicot C<sub>3</sub> species Frob (from this study) and monocotyledonous C<sub>3</sub> species *Oryza sativa* (Osat). The GRN of Osat was constructed based on RNA-seq data using the same package (PCA-CMI)<sup>27</sup> with Spearman

correlation coefficient  $>0.8$ , Pearson correlation coefficient  $>0.8$  and P-value  $<0.001$  (The Osat of GRN was not published yet). The RNA-seq data from Osat was obtained from 16 time points within one day, with three replicates for each time point. We found that among shared ERF TFs between Ftri C<sub>4</sub>GRN and Zmay C<sub>4</sub>GRN (including 14 Ftri ERF TFs and 12 Zmay TFs), 3 of them were in the C<sub>4</sub>GRN of C<sub>3</sub> species Frob, and 2 of them co-regulated C<sub>4</sub> orthologous genes in Osat (Table S 10). The results therefore suggested that common TFs between Ftri and Zmay were recruited to regulate C<sub>4</sub> genes during the later stage of C<sub>4</sub> evolution, i.e., they do not regulate C<sub>3</sub> counterparts in C<sub>3</sub> ancestors.

Though the ERF TFs were present in C<sub>3</sub> species, their expression level changed during C<sub>4</sub> evolution. Among the 323 TFs in the C<sub>4</sub>GRN of the Ftri (C<sub>4</sub>), 96 TFs (including 7 ERF TFs) and 55 TFs (including 1 ERF TF) showed significantly higher and lower transcript abundance in Ftri than in Frob (C<sub>3</sub>), respectively (Fig. S 25 a). Besides, among the shared 14 ERF TFs between Ftri C<sub>4</sub>GRN and Zmay C<sub>4</sub>GRN, five of them showed higher transcript abundances in Ftri (C<sub>4</sub>) than their counterparts in Frob (C<sub>3</sub>) (Fig. S 25 b), suggesting that though C<sub>4</sub> ERF TFs were present in C<sub>3</sub> species, the expression level of ERF TFs were changed during evolution.

**Table S 8. RNA-seq datasets used for constructing gene regulatory networks for the five *Flaveria* species**

| Species     | low CO <sub>2</sub> | low CO <sub>2</sub> | low CO <sub>2</sub> | ABA     | high light | # total Samples |
|-------------|---------------------|---------------------|---------------------|---------|------------|-----------------|
|             | 2 weeks             | 4 weeks             | 6 months            | 3 hours | 2 weeks    |                 |
| <b>Frob</b> | 6                   | 6                   | 4                   | 6       | 6          | <b>28</b>       |
| <b>Fson</b> | 6                   | 6                   | 4                   | 6       | n.a        | <b>22</b>       |
| <b>Flin</b> | 6                   | 6                   | n.a                 | n.a     | 6          | <b>18</b>       |
| <b>Fram</b> | 6                   | 6                   | n.a                 | 6       | 6          | <b>24</b>       |
| <b>Ftri</b> | 6                   | 6                   | n.a                 | 6       | 6          | <b>24</b>       |

Note: n.a: not available

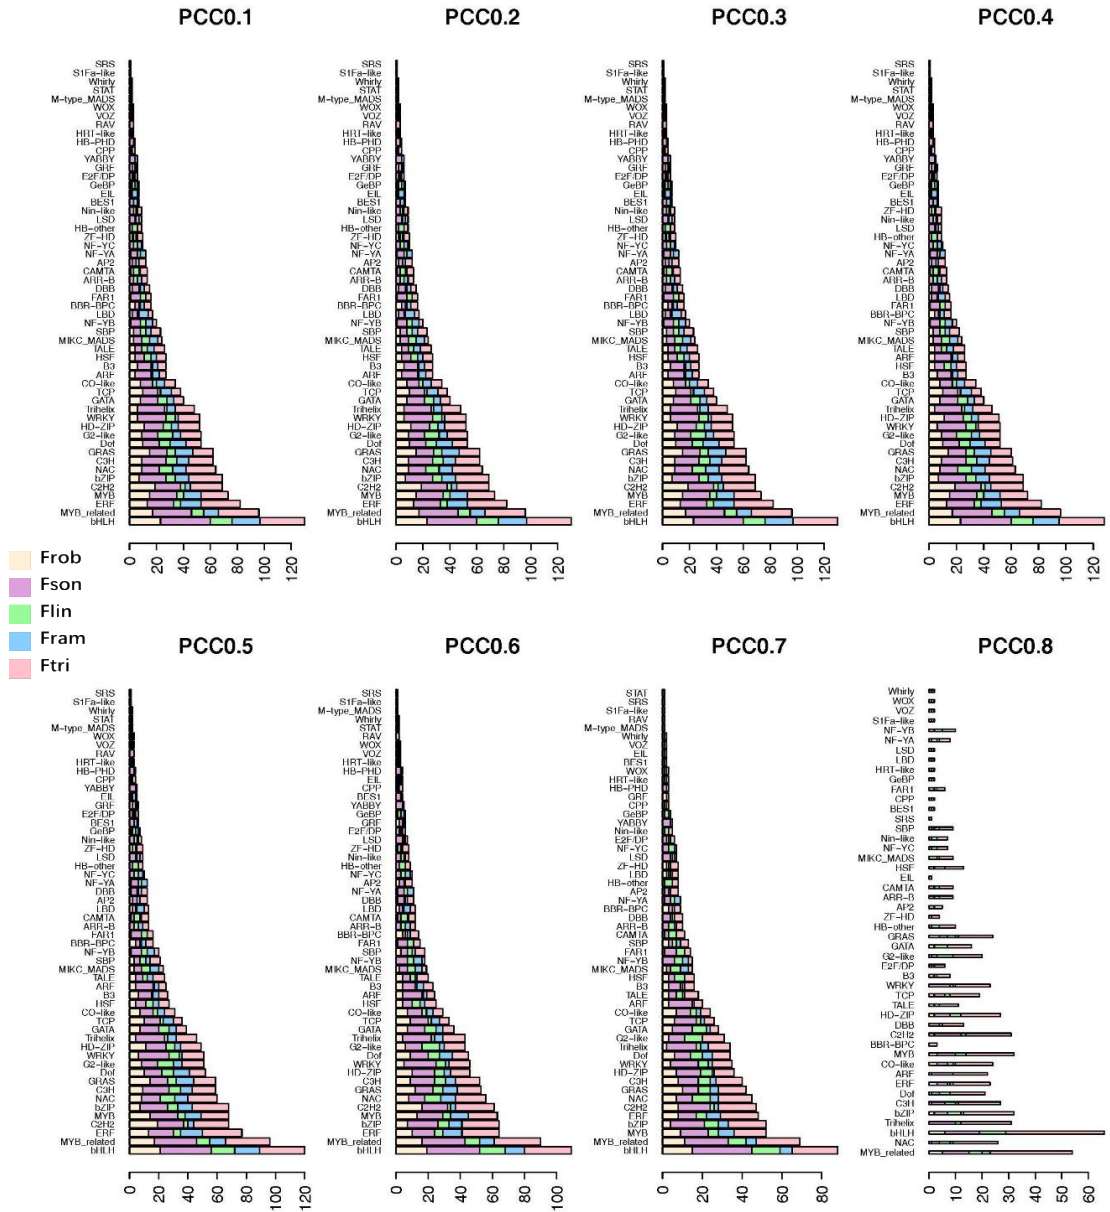

Fig. S 20. Distributions of C<sub>4</sub>TFs in each TF family for each *Flaveria* species under different PCCs cutoffs

Bar plots showing the TFs number for each TF family across four *Flaveria* species under different thresholds of PCC cutoffs ranging from 0.1 to 0.8. The X axes display the number of TFs for each TF family.

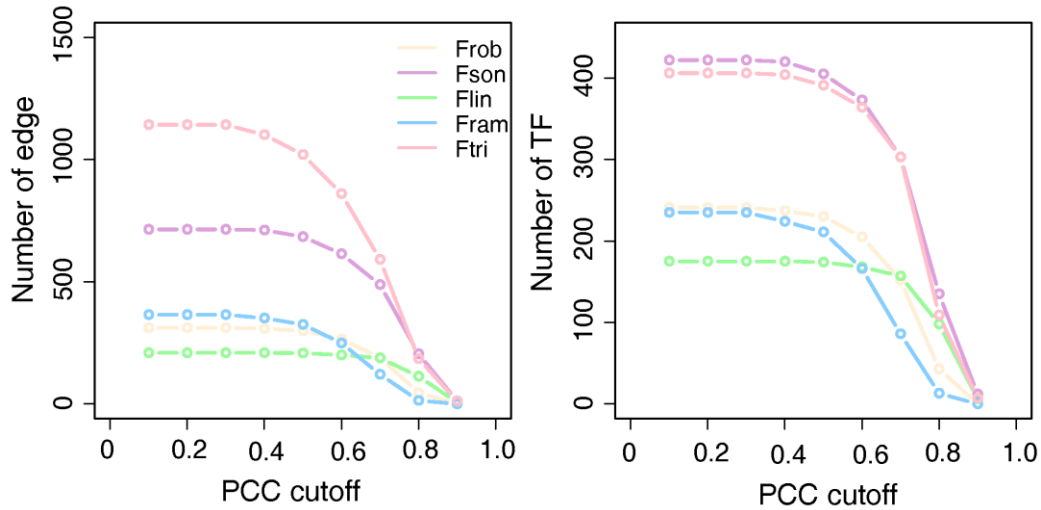

Fig. S 21. **The number of edges and TFs of C<sub>4</sub>GRN under different PCC cutoffs**

Curves showing the distributions of C<sub>4</sub>GRN edges (interaction between C<sub>4</sub> genes and TFs) in five *Flaveria* species under PCC cutoffs ranging from 0.1 to 0.9. The number of edges shows an inflection point at a PCC of 0.5.

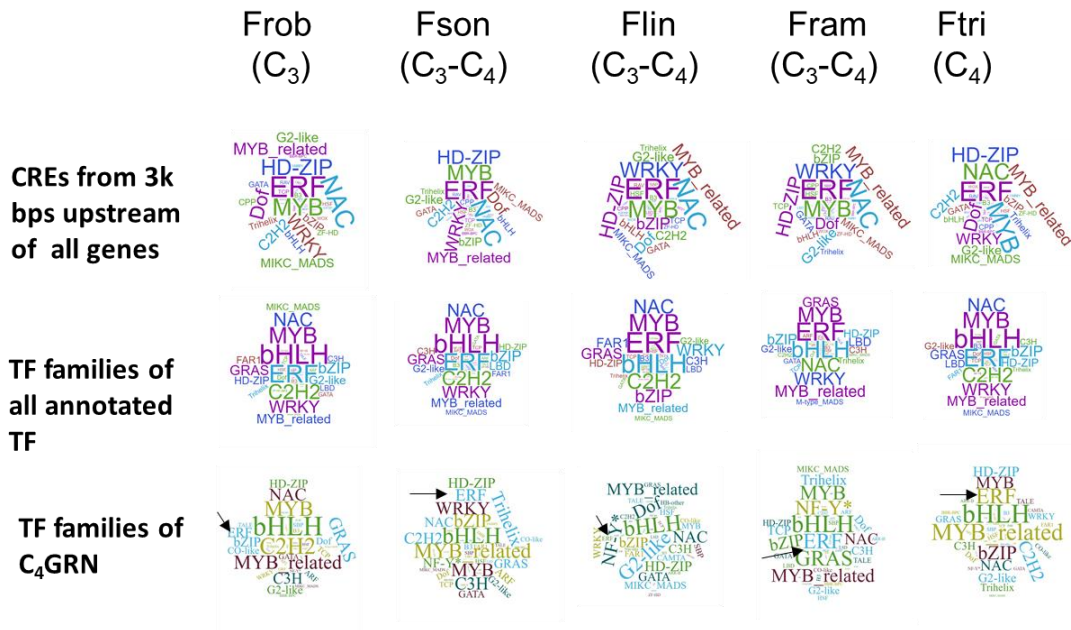

Fig. S 22. **ERF TFs are more abundant in C<sub>4</sub>GRN of the C<sub>4</sub> species than those of other species**

Word clouds indicating the frequency of predicted *cis*-regulatory elements (CREs) from the 3k bps upstream of all genes in different species (top panel); all predicted TFs (middle panel) and C<sub>4</sub> genes co-regulated TFs (bottom panel), with larger names indicating more abundance. Note that ERF CREs are abundant across all the five *Flaveria* species, and the number of annotated ERF TFs are comparable in the five *Flaveria* species, whereas ERF TFs are more abundant in C<sub>4</sub>GRN of the C<sub>4</sub> species Ftri than those of other species.

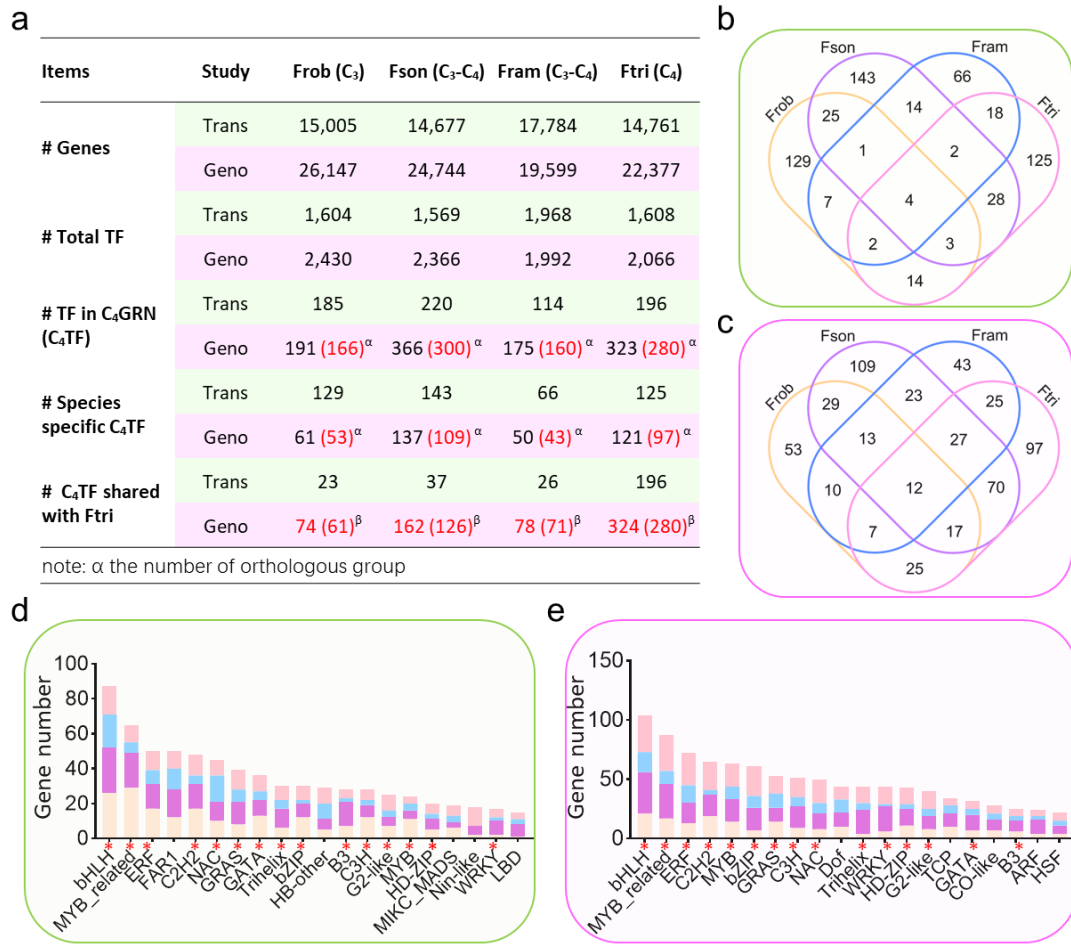

**Fig. S 23. Comparison of C<sub>4</sub> GRN based on RNA-seq data with either genome annotation or transcript annotation.**

(a) Statistics of GRNs based on transcript-based annotation (Trans. for short) from a previous study <sup>26</sup> and genome-based annotation (Geno. for short) from this study. α and β represent the number of orthologous groups that the under-studied TFs belonging to. (b) and (c) Venn diagram showing the intersection between TFs across four *Flaveria* species from transcript-based C<sub>4</sub>GRN and genome-based C<sub>4</sub>GRN, respectively. The numbers in (c) represents the number of orthologous groups instead of genes. (d) and (e) Bar plots showing the frequency of the top 20 TF families with the greatest number of genes in C<sub>4</sub>GRNs from transcript-based GRN and genome-based GRN respectively. TF families shared between transcript-based GRN and genome-based GRN are marked with red a star.



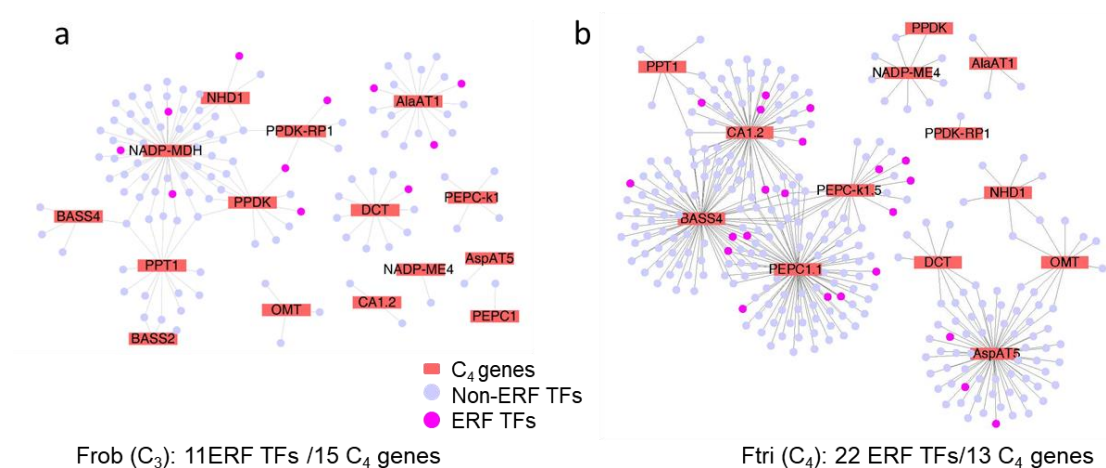

**Fig. S 24. The C<sub>4</sub>GRN of Ftri and Frob**

(a)The C<sub>4</sub>GRN of the C<sub>3</sub> species Frob. The C<sub>4</sub>GRN of the Ftri (C<sub>4</sub>) was shown in Fig. S6 in the manuscript. (c) C<sub>4</sub>GRN of Ftri including only one copy for *CA1*, *PEPC1*, and *PEPC-k1* respectively.

**Table S 9. Four counterparts of C<sub>4</sub> ERF TF in Ftri coregulate counterparts of C<sub>4</sub> genes in the C<sub>3</sub> species Frob**

| Orthologous group | ID of Frob (C <sub>3</sub> ) | TF family | Coregulated C <sub>4</sub> orthologous genes in C <sub>4</sub> GRN |
|-------------------|------------------------------|-----------|--------------------------------------------------------------------|
| OG0003450         | Frob15G32959                 | ERF       | Frob9G16612_NADP-MDH                                               |
| OG0003676         | Frob11G13246                 | ERF       | Frob9G30036_NADP-ME4                                               |
| OG0001395         | Frob18G09268                 | ERF       | Frob3G31625_NHD1                                                   |
| OG0001395         | FrobNA15531                  | ERF       | Frob9G30036_NADP-ME4                                               |

**Table S 10. Common C<sub>4</sub> ERF TF between Ftri and Zmay that are coregulated with counterparts of C<sub>4</sub> genes in the C<sub>3</sub> species Frob and Osat**

| Orthologous group           | ID in C <sub>3</sub> species | TF family | Coregulated C <sub>4</sub> orthologous genes |
|-----------------------------|------------------------------|-----------|----------------------------------------------|
| <b>Frob (C<sub>3</sub>)</b> |                              |           |                                              |
| OG0003450                   | Frob15G32959                 | ERF       | Frob9G16612_NADP-MDH                         |
| OG0001395                   | Frob18G09268                 | ERF       | Frob3G31625_NHD1                             |
| OG0001395                   | FrobNA15531                  | ERF       | Frob9G30036_NADP-ME4                         |
| <b>Osat (C<sub>3</sub>)</b> |                              |           |                                              |
| OG0000014                   | Os01g0752500                 | ERF       | Os01g0752500_PPDK-RP                         |
| OG0000023                   | Os01g0797600                 | ERF       | Os01g0797600_DIC                             |

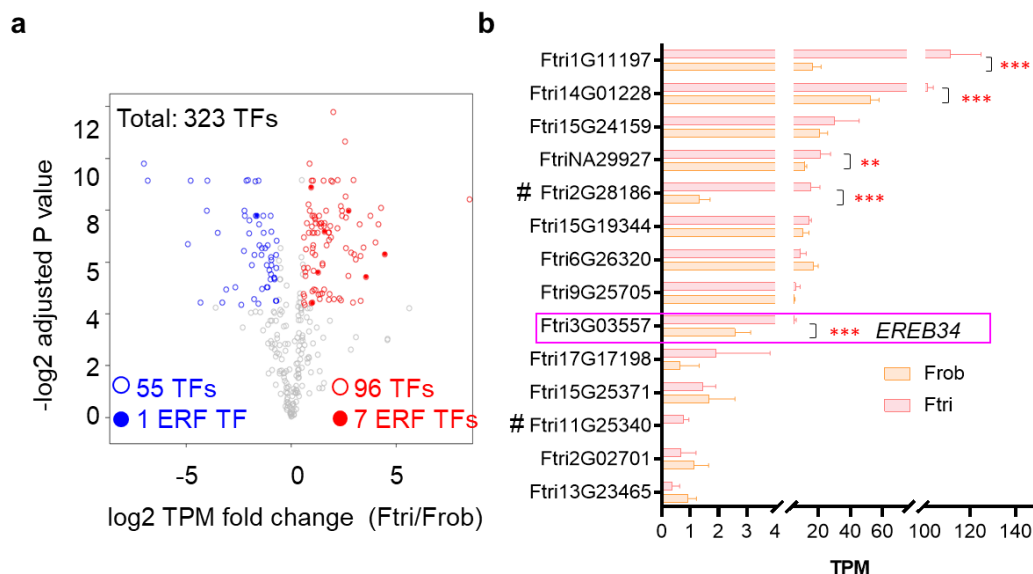

**Fig. S 25. The change of transcript abundances of C<sub>4</sub>TF between Ftri and Frob**  
 (a) Volcano plot shows differentially expressed C<sub>4</sub>TFs of Ftri (C<sub>4</sub>) between Ftri and Frob (C<sub>3</sub>).  
 (b) The transcript abundance of 14 common C<sub>4</sub> ERF TFs between Ftri and Zmay in Ftri and their counterparts in Frob. Intron-containing genes are marked with “#”, *EREB34* is indicated. Statistical significance between Frob and Ftri were calculated using edge R with an adjusted *P* value threshold of 0.05 and a foldchange threshold of 1.5. Statistical significances were represented as \*: *P* < 0.05, \*\* *P* < 0.01, and \*\*\* *P* < 0.001. (Abbreviation: TPM: transcript per million mapped reads.)

### 13. Comparison of transcript abundances based on RNA-seq data

#### Methods

RNA-seq data from Frob, Fson, Fram and Ftri are from our previous study<sup>30</sup> (Table S 8). Additionally, 18 RNA-seq datasets of Flin were generated in this study, including six RNA-seq datasets from a 2-week low CO<sub>2</sub> experiment (three from normal CO<sub>2</sub> condition, *i.e.*, 380 ppm, and three from low CO<sub>2</sub> condition *i.e.*, 100 ppm), six RNA-seq samples from a 4-week low CO<sub>2</sub> experiment (three from normal CO<sub>2</sub> condition and three from low CO<sub>2</sub> condition), and six RNA-seq datasets from high light experiment (three from normal light condition, *i.e.*, 500 μmol m<sup>-2</sup> s<sup>-1</sup>, and three from high light condition, *i.e.*, 1400 μmol m<sup>-2</sup> s<sup>-1</sup>). The low CO<sub>2</sub> experiments on Flin were conducted with those of the other four species. Plants were grown in a growth chamber with a photosynthetic photon flux density (PPFD) controlled to be 200 μmol

$\text{m}^{-2} \text{s}^{-1}$ , and a temperature of  $22 \pm 2^\circ\text{C}$ , 70% relative humidity (RH), and a photoperiod of 16 hours light/8 hours dark. The  $\text{CO}_2$  concentration used for the low  $\text{CO}_2$  treatment was 100 ppm and the control  $\text{CO}_2$  concentration was 380 ppm. The high light experiment on Flin was conducted together with those of Frob, Fram and Ftri. Plants were grown in a phytotron with a PPFD of  $1400 \mu\text{mol m}^{-2} \text{s}^{-1}$  for high light condition and  $500 \mu\text{mol m}^{-2} \text{s}^{-1}$  for normal light condition. The high light condition was achieved by supplementing light with a lab-made light emitting diode (LED) light source. Genes were clustered into 10 patterns using Kmeans based on their transcript abundance across the five *Flaveria* species.

## Results

To compare transcript profiling of the five *Flaveria* species, three RNA-seq datasets from the normal  $\text{CO}_2$  condition of the 2-week low  $\text{CO}_2$  experiment and three from the normal  $\text{CO}_2$  condition of the 4-week low  $\text{CO}_2$  experiment were used for all five *Flaveria* species. Transcript abundances were calculated as transcript per million mapped reads (TPM). In total, 27,684 genes were retained with the maximum transcript abundance no less than 1 TPM in the five *Flaveria* species. We found that six replicates of a certain species had high Pearson correlations (Fig. S 26). The 27,684 genes were clustered into 10 patterns according to their evolutionary profiles ( Fig. S 27).  $\text{C}_4$  genes were mainly clustered in one pattern (P3), in which  $\text{C}_4$  species showed the highest transcript abundances, and photorespiratory genes were mainly clustered in one pattern (P8), where Flin showed the highest transcript abundance.

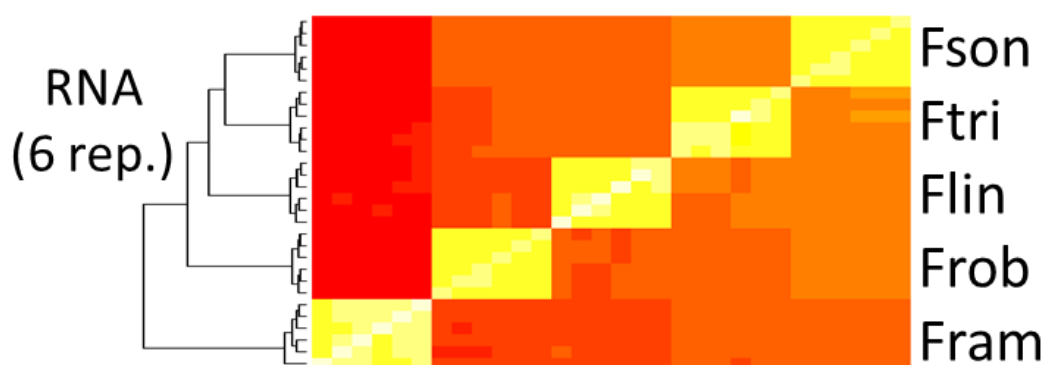

Fig. S 26. **Pearson correlations of RNA-seq datasets for five *Flaveria* species in transcript abundances**

(a) Heatmap showing the Pearson correlations of RNA-seq samples based on transcript abundances of all detected genes. The transcript abundances were calculated as transcript per million mapped reads (TPM). Six RNA-seq samples were used to compare the gene expression profiles along evolutionary history, including three RNA-seq samples from normal CO<sub>2</sub> condition of 2-week low CO<sub>2</sub> experiment, and three RNA-seq samples from normal CO<sub>2</sub> condition of 4-week low CO<sub>2</sub> experiment.

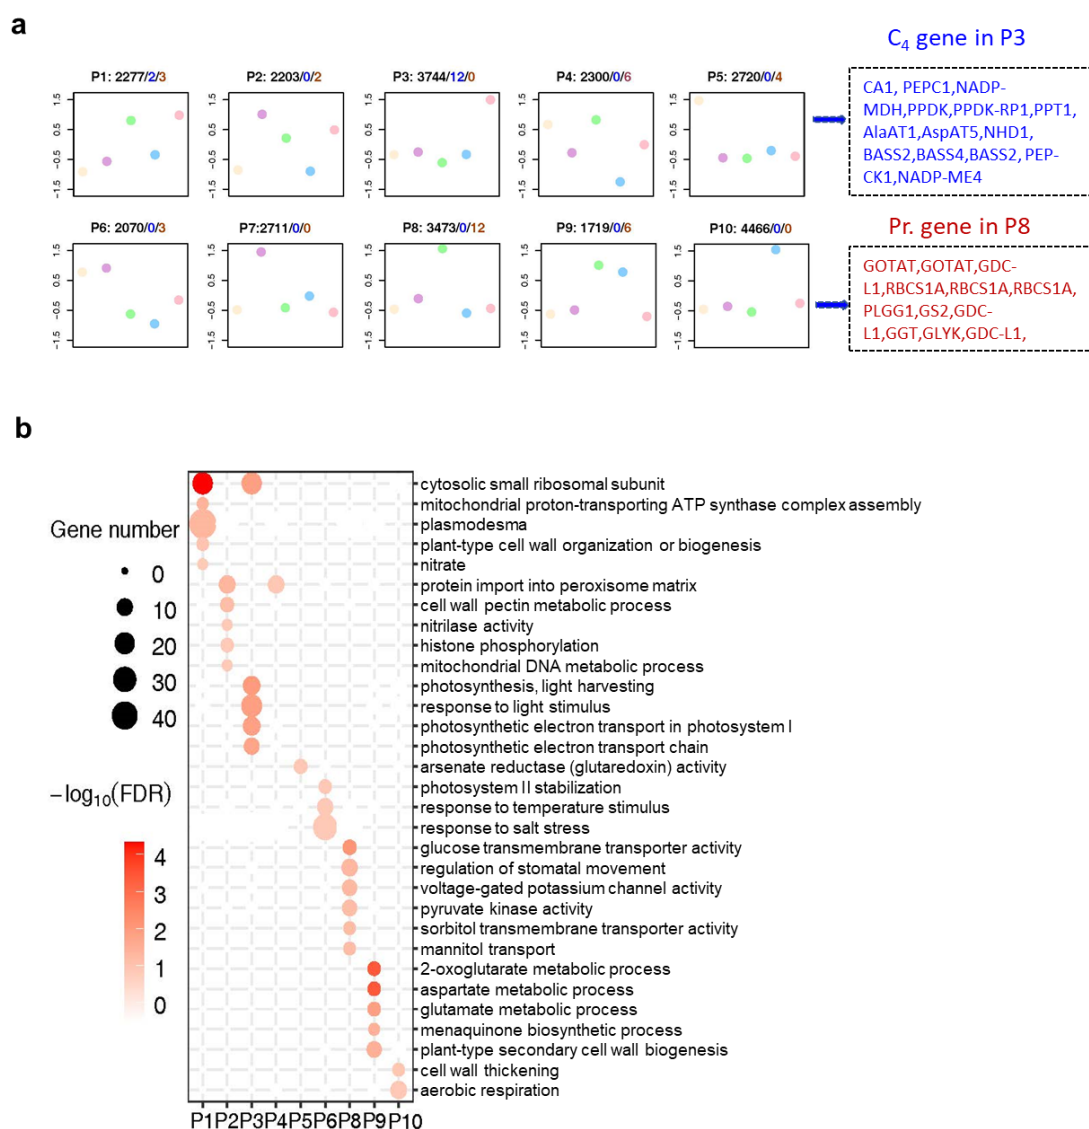

**Fig. S 27. Ten evolutionary patterns of the detected genes based on transcript abundances**  
 (a) Genes were clustered into ten patterns (P for short, from P1 to P10) according to their expression profiles in the five *Flaveria* species. Genes were clustered using Kmeans based on mean transcript abundances from six RNA-seq samples for each species (see methods above). The numbers on the top of each pattern represent: black for all genes, blue for C<sub>4</sub> genes and red for photorespiratory genes. C<sub>4</sub> genes in pattern 3 (P3) and photorespiratory genes in pattern 8 (P8) are listed in dashed frame. (b) The enriched gene ontology (GO) terms of genes from each pattern. Pattern 7 (P7) showed no enriched gene ontology. Enriched GO terms were

calculated using a *Fisher's* test with a *P* value threshold of 0.01 adjusted using Benjamini & Hochberg method.

## **14. Comparison of protein abundance based on proteomics**

### **Methods**

#### **Tryptic digestion**

A FASP (Filter-Aided Sample Prep) digestion was adapted for the following procedures in Microcon PL-10 filters. After buffer displacement three times with 8 M Urea in 25 mM ABC (ammonium hydroxide), proteins were reduced using 10 mM DTT at 37 °C for 30 minutes, followed by alkylation with 30 mM iodoacetamide at 25 °C for 45 minutes in the dark, and digestion with trypsin (enzyme/protein at a 1:50 ratio) at 37 °C for 12 h after washed with 20% ACN and buffer displaced three times with digestion buffer (30 mM ABC). After digestion, the solution was filtered, and the filter was washed twice with 15% CAN. All filtrates were pooled and vacuum-dried.

#### **High pH HPLC Fractionation**

To generate a data dependent acquisition (DDA) library, peptides were prefractionated using a Dionex UltiMate 3000 HPLC system (Thermo Fisher Scientific, USA) with a C18 column (3 µm, 2× 150 mm, Phenomenex, USA). HPLC solvent A was 10 mM NH<sub>4</sub>HCO<sub>3</sub>, solvent B was 10 mM NH<sub>4</sub>HCO<sub>3</sub> in 80% ACN. Peptides from each sample were mixed (a total of 200 µg), dried, and dissolved with 10mM NH<sub>4</sub>HCO<sub>3</sub>. The mixture was separated by a linear gradient with a flow rate of 200nL/min. The gradient was set as follows: 5-40% in 25 min, and 40-100% in 5 min. Finally, 30 fractions were mixed into 15 samples, and vacuum-dried completely.

#### **LC-MS/MS Analysis**

LC-MS/MS analysis was performed using an EASY-nLC 1200 system (Thermo Fisher Scientific, USA) coupled to an Orbitrap Fusion Lumos mass spectrometer (Thermo Fisher Scientific, USA). Samples were resuspended in 1% FA, and iRT peptides (Biognosys, Switzerland) were added prior to MS analysis. Peptides were analyzed using a home-made C18 analytical column (75 µm i.d. × 25 cm, ReproSil-

Pur 120 C18-AQ, 1.9  $\mu\text{m}$  (Dr. Maisch GmbH, Germany)). The mobile phases consisted of Solvent A (0.1% formic acid) and Solvent B (0.1% formic acid in 80%ACN). The peptides were eluted using the following gradient: 2-5% B in 2 minutes, 5-35% B in 100 minutes, 35-44% B in 6 minutes, 44-100% B in 3 minutes, 100% B for 10 minutes, at a flow rate of 200 nL/min.

For DDA experiments, the resolution of full MS scans was set as 60000 at m/z 200, the AGC target was set as  $4^{e5}$  with a maximum injection time of 50 ms. The scan range was set as 400-1200 m/z. For MS2, the Normalized AGC target was set as 100% with a resolution of 15,000 and maximum injection time of 22 ms, and the NCE was set as 30%. The cycle time was set as 2 seconds.

Data independent acquisition (DIA) analysis was set as three full MS scans, and each full MS scan was followed by 20 MS2 windows. The first 20 windows were set as shown in Table S 11; the second 20 windows were set as shown Table S 12; and the third was set as shown Table S 13. The resolution of full MS scans was set as 120000 at m/z 200 and full MS Normalized AGC target was 100% with a maximum injection time of 50 ms, and a scan range was of 400-1200. The resolution of MS2 was set as 30000 with a maximum injection time of 54 ms, and the NCE was set as 32%.

### **Data Processing**

DIA data analysis was performed using Spectronaut (version 14.7, Biognosys, Zurich, Switzerland). High precision iRT calibration was employed. The library was generated by the search engine platform Pulsar in Spectronaut (version 14.7, Biognosys, Zurich, Switzerland) using default settings, and DIA data were analyzed using default settings disabling the PTM localization filter. Mass tolerance/accuracy for precursor and fragment identification was set to default settings. FDR at the peptide and protein level was set to 1% using a mutated decoy model. For matching of DIA data to the spectral library, the applied mass and retention time tolerances (for both MS1 and MS2) are dynamic based on the m/z of the targeted ion and the retention time of the scan. The calibration was performed for each run individually. Default settings for quantification at MS1 level were employed for quantification.

Table S 11. Settings of the first 20 windows of the MS scan for DIA analysis

| m/z      | z | t start (min) | t stop (min) | Isolation Window (m/z) | Normalized AGC Target (%) |
|----------|---|---------------|--------------|------------------------|---------------------------|
| 403.9562 | 2 | 0             | 120          | 10.50613               | 100                       |
| 412.7018 | 2 | 0             | 120          | 8.984924               | 100                       |
| 420.2895 | 2 | 0             | 120          | 8.190521               | 100                       |
| 427.8015 | 2 | 0             | 120          | 8.833588               | 100                       |
| 435.2217 | 2 | 0             | 120          | 8.006775               | 100                       |
| 442.1428 | 2 | 0             | 120          | 7.835449               | 100                       |
| 449.1415 | 2 | 0             | 120          | 8.161926               | 100                       |
| 455.9776 | 2 | 0             | 120          | 7.510254               | 100                       |
| 462.5025 | 2 | 0             | 120          | 7.539642               | 100                       |
| 469.2666 | 2 | 0             | 120          | 7.988556               | 100                       |
| 476.0137 | 2 | 0             | 120          | 7.505493               | 100                       |
| 482.5152 | 2 | 0             | 120          | 7.497589               | 100                       |
| 489.0068 | 2 | 0             | 120          | 7.485657               | 100                       |
| 495.4973 | 2 | 0             | 120          | 7.49527                | 100                       |
| 502.3288 | 2 | 0             | 120          | 8.167694               | 100                       |
| 509.1054 | 2 | 0             | 120          | 7.38559                | 100                       |
| 515.7923 | 2 | 0             | 120          | 7.988098               | 100                       |
| 522.9423 | 2 | 0             | 120          | 8.311951               | 100                       |
| 529.9496 | 2 | 0             | 120          | 7.702576               | 100                       |
| 537.0469 | 2 | 0             | 120          | 8.492188               | 100                       |

Table S 12. Settings of the second 20 windows of the MS scan for DIA analysis

| m/z      | z | t start (min) | t stop (min) | Isolation Window (m/z) | Normalized AGC Target (%) |
|----------|---|---------------|--------------|------------------------|---------------------------|
| 544.5246 | 2 | 0             | 120          | 8.463196               | 100                       |
| 551.7519 | 2 | 0             | 120          | 7.991333               | 100                       |
| 558.9966 | 2 | 0             | 120          | 8.497986               | 100                       |
| 566.2987 | 2 | 0             | 120          | 8.106323               | 100                       |
| 573.6986 | 2 | 0             | 120          | 8.693542               | 100                       |
| 581.1627 | 2 | 0             | 120          | 8.234558               | 100                       |
| 588.5497 | 2 | 0             | 120          | 8.53949                | 100                       |
| 596.3158 | 2 | 0             | 120          | 8.992615               | 100                       |
| 604.7009 | 2 | 0             | 120          | 9.77771                | 100                       |
| 613.4788 | 2 | 0             | 120          | 9.777954               | 100                       |
| 622.3413 | 2 | 0             | 120          | 9.947144               | 100                       |
| 631.3462 | 2 | 0             | 120          | 10.06268               | 100                       |
| 640.3571 | 2 | 0             | 120          | 9.959106               | 100                       |

|          |   |   |     |          |     |
|----------|---|---|-----|----------|-----|
| 649.5827 | 2 | 0 | 120 | 10.492   | 100 |
| 658.9945 | 2 | 0 | 120 | 10.33167 | 100 |
| 668.4948 | 2 | 0 | 120 | 10.66895 | 100 |
| 678.3311 | 2 | 0 | 120 | 11.00366 | 100 |
| 688.5067 | 2 | 0 | 120 | 11.3476  | 100 |
| 699.021  | 2 | 0 | 120 | 11.68085 | 100 |
| 710.0473 | 2 | 0 | 120 | 12.37189 | 100 |

**Table S 13. Settings of the third 20 windows of the MS scan for DIA analysis**

| m/z      | z | t start (min) | t stop (min) | Isolation<br>Window (m/z) | Normalized AGC<br>Target (%) |
|----------|---|---------------|--------------|---------------------------|------------------------------|
| 721.2844 | 2 | 0             | 120          | 12.10229                  | 100                          |
| 732.6165 | 2 | 0             | 120          | 12.56189                  | 100                          |
| 744.5228 | 2 | 0             | 120          | 13.25073                  | 100                          |
| 757.0234 | 2 | 0             | 120          | 13.75037                  | 100                          |
| 770.527  | 2 | 0             | 120          | 15.25696                  | 100                          |
| 784.5499 | 2 | 0             | 120          | 14.78882                  | 100                          |
| 798.5827 | 2 | 0             | 120          | 15.27673                  | 100                          |
| 813.0505 | 2 | 0             | 120          | 15.65894                  | 100                          |
| 827.7426 | 2 | 0             | 120          | 15.7251                   | 100                          |
| 843.2513 | 2 | 0             | 120          | 17.2923                   | 100                          |
| 859.7603 | 2 | 0             | 120          | 17.72589                  | 100                          |
| 877.4602 | 2 | 0             | 120          | 19.67383                  | 100                          |
| 897.1549 | 2 | 0             | 120          | 21.71552                  | 100                          |
| 918.4784 | 2 | 0             | 120          | 22.93158                  | 100                          |
| 941.9666 | 2 | 0             | 120          | 26.04468                  | 100                          |
| 968.4867 | 2 | 0             | 120          | 28.99554                  | 100                          |
| 1000.831 | 2 | 0             | 120          | 37.69305                  | 100                          |
| 1041.069 | 2 | 0             | 120          | 44.78284                  | 100                          |
| 1089.265 | 2 | 0             | 120          | 53.60974                  | 100                          |
| 1157.785 | 2 | 0             | 120          | 85.42993                  | 100                          |

## Results

SDS PAGE indicated that C<sub>4</sub> species had lower abundances of ribulose-1,5-bisphosphate carboxylase-oxygenase (RubisCO) and higher abundances of PPDK and PEPC than C<sub>3</sub> and C<sub>3</sub>-C<sub>4</sub> intermediate species (Fig. S 28). On average, 6,469 proteins (from 6,205 in Fram to 6,640 in Ftri) were detected in each species. For the following analysis, only proteins detected with a unique ID in at least 15 samples were retained, which resulted in 4,908 proteins. We found that the protein abundances of 4,908 proteins across six replicates from a same species showed higher correlations than



those between species (Fig. S 29), implying the reliability of sampling and protein quantifications. All proteins were clustered into 10 patterns according to their profiles among the five *Flaveria* species using Kmeans (Fig. S 30). Interestingly, in line with the Kmeans analysis of transcript abundances, C<sub>4</sub> genes were primarily classified into one single pattern, in which the C<sub>4</sub> species Ftri showed the highest abundances. Similarly, photorespiratory genes were mainly clustered into one pattern, in which C<sub>4</sub> species had the lowest abundances (Fig. S 30). C<sub>4</sub> genes had higher protein abundances in the C<sub>4</sub> species Ftri than in other species (Fig. S 31), whereas photorespiratory genes had lower protein abundances in the C<sub>4</sub> species than other species (Fig. S 32), consistent with previous reports<sup>31</sup>.

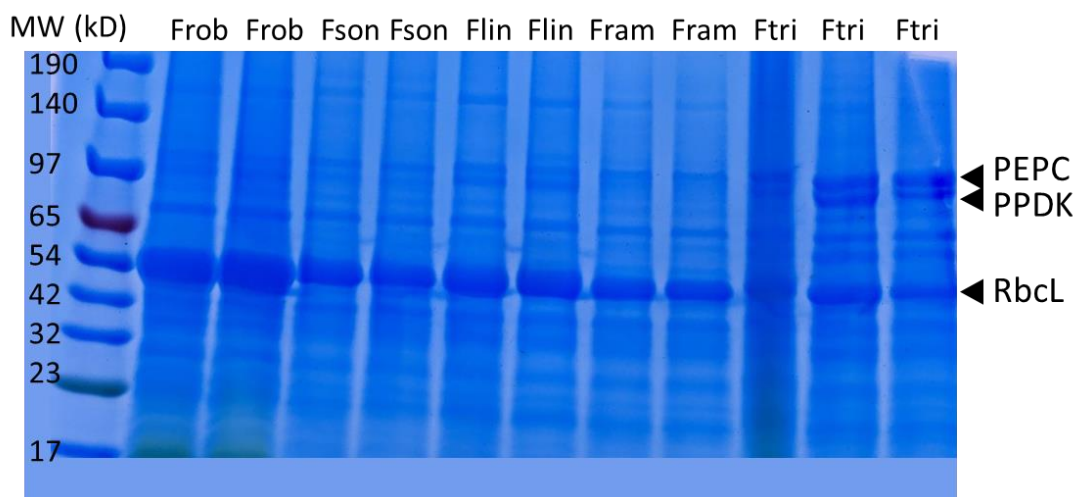

**Fig. S 28. SDS PAGE of the total proteins of *Flaveria* leaves**

Total proteins were isolated from mature leaves and separated with 12% SDS PAGE on the basis of same leaf area. Two or three replicates were run for each species. (Abbreviations: RubisCO: ribulose-1,5-bisphosphate carboxylase-oxygenase, PEPC: phosphoenolpyruvate carboxylase; PPK, pyruvate/orthophosphate dikinase.)

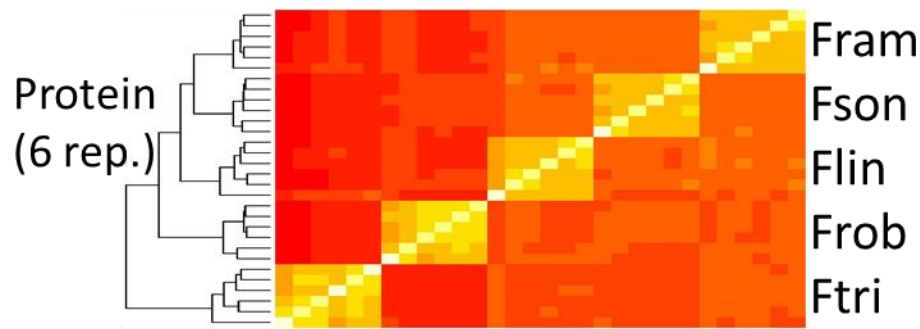

Fig. S 29. **Pearson correlation of protein datasets of *Flaveria* species in protein abundances**

Heatmap showing protein abundances in log2 transformed label free quantification (LFQ) for the five *Flaveria* species. Note that six biological replicates of the same species are clustered as one branch.

a

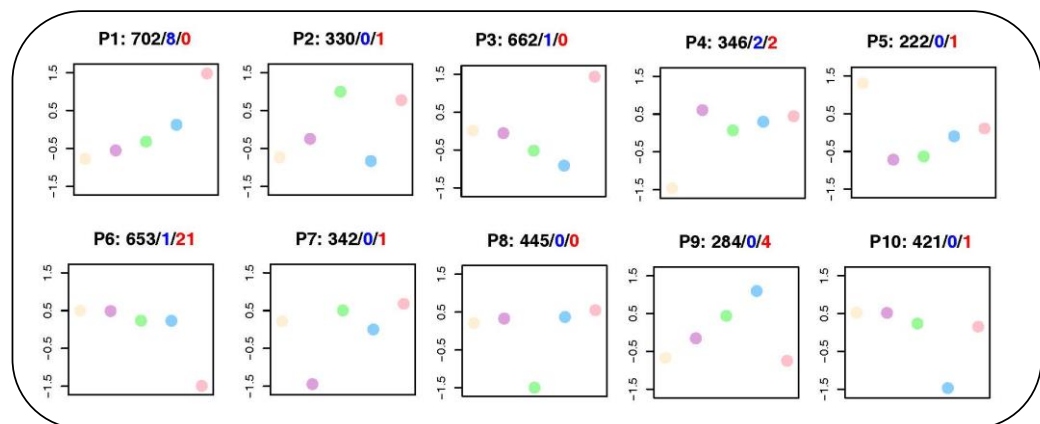

b

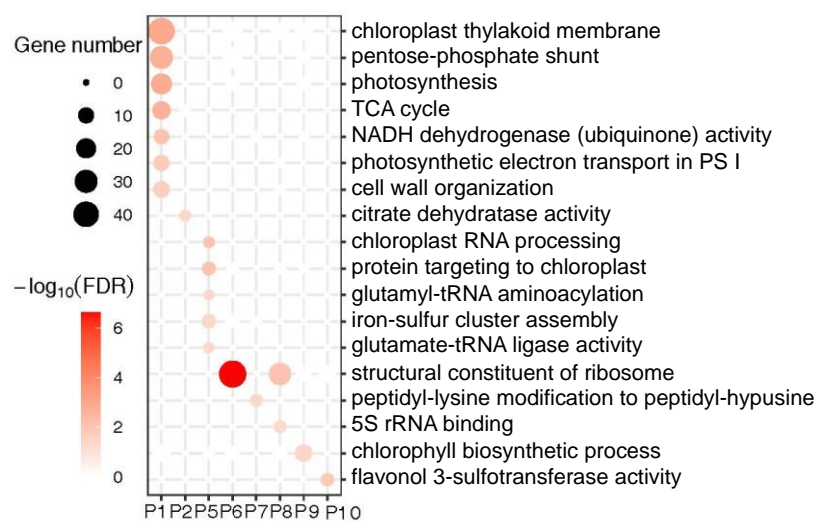

Fig. S 30. **Ten evolutionary patterns of the detected genes based on protein abundances**

(a) Genes were clustered into 10 patterns according to their protein profiles within the five

*Flaveria* species. Genes were clustered using Kmeans based on the mean protein abundances in label free quantification (LFQ) from six biological replicates for each species. The numbers on the top of each pattern represent: black for all genes, blue for C<sub>4</sub> genes and red for photorespiratory genes. (b) Enriched gene ontology (GO) terms of genes from each pattern. Enriched GO terms were calculated using *Fisher's* test with a P value threshold of 0.01 adjusted applying Benjamini & Hochberg method.

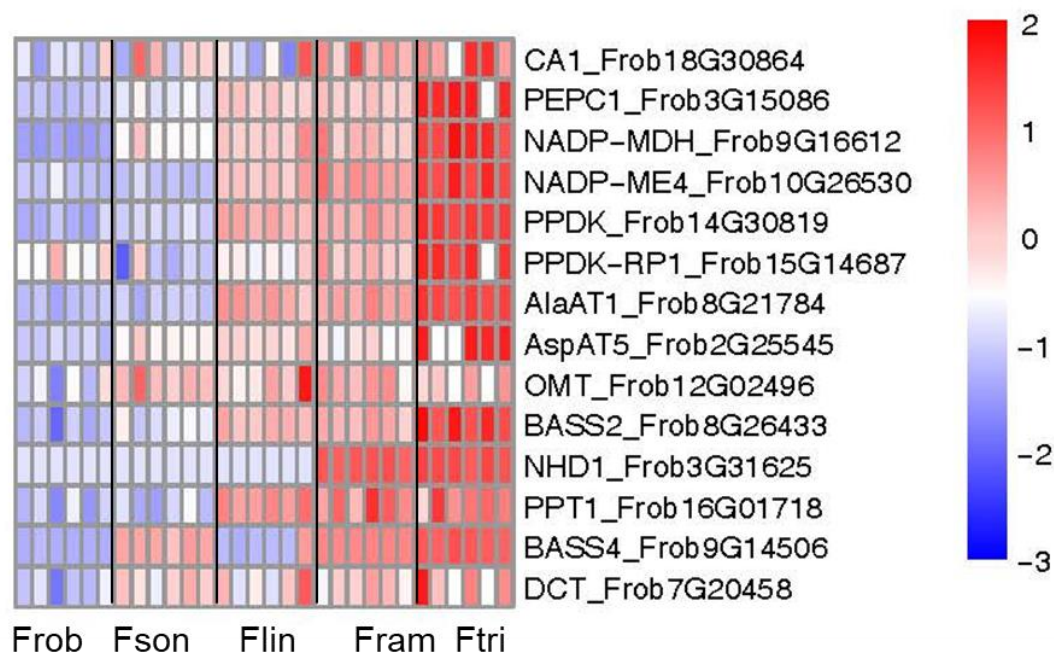

**Fig. S 31. Protein abundances of C<sub>4</sub> genes**

Heatmap showing the log<sub>2</sub> transformed protein abundances in label free quantification (LFQ). (Abbreviations: CA1: carbonic anhydrase 1; PEPC1: phosphoenolpyruvate carboxylase 1; NADP-MDH: NADP-dependent malate dehydrogenase; NADP-ME4: NADP-dependent malic enzyme 4; PPDK: pyruvate/orthophosphate dikinase; PPDK-RP, PPDK regulatory protein; AlaAT1, alanine aminotransferase 1; AspAT5, aspartate aminotransferase 5; OMT, oxaloacetate/malate transporter, or dicarboxylate transporter 1 (DiT1); BASS2, bile acid sodium symporter 2; NHD1, sodium: hydrogen antiporter 1; PPT1, phosphate/phosphoenolpyruvate translocator 1; BASS4, bile acid sodium symporter 4, and DCT: dicarboxylate transporter 2.1 (DiT2.1))

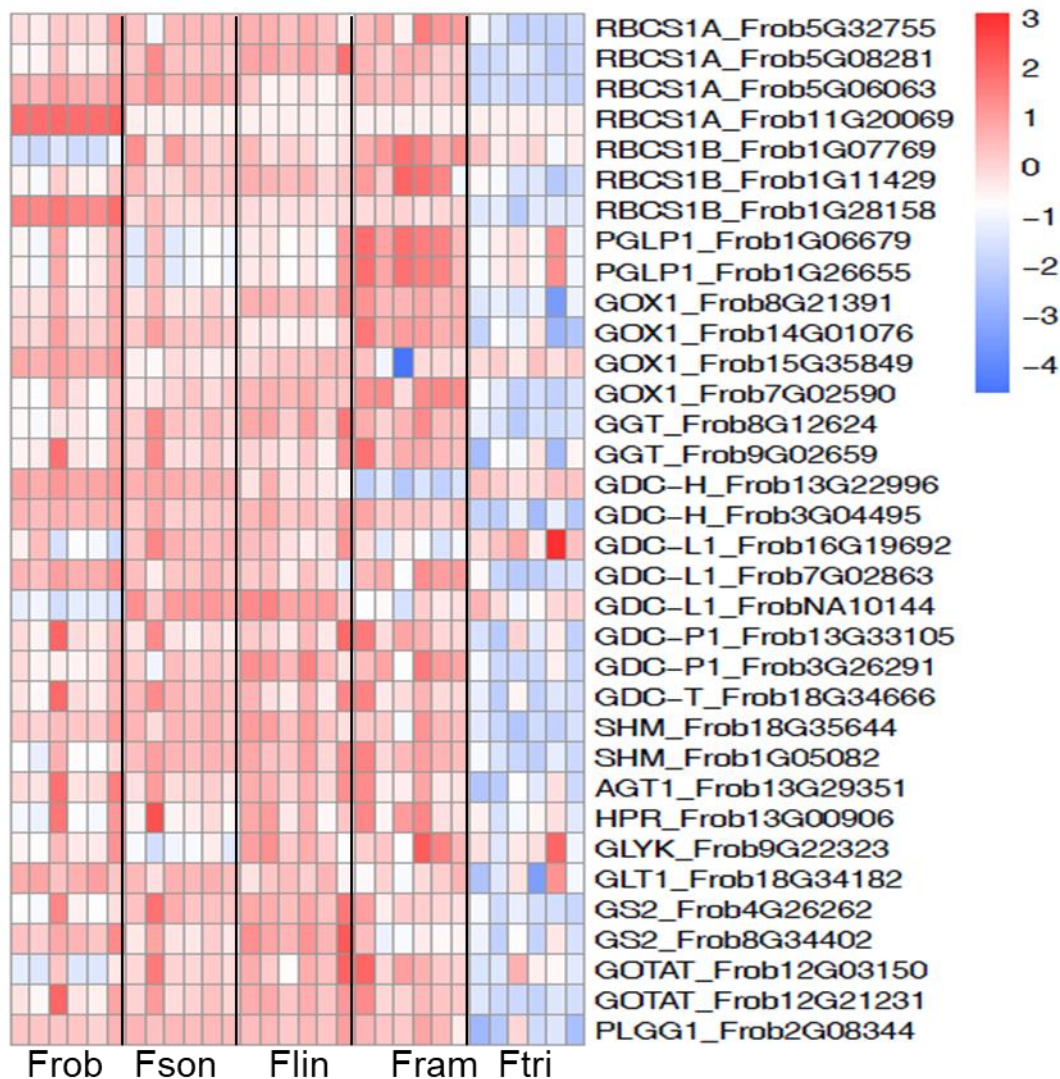

Fig. S 32. **Protein abundance of photorespiratory genes**

Heatmap showing the log<sub>2</sub> transformed protein abundance in label free quantification (LFQ). (Abbreviations: RBCS1A: Ribulose-1,5-bisphosphat-carboxylase/-oxygenase (RubisCO) small subunit 1 A/B; RBSC1B: RubisCO small subunit B; PGLP1: 2-phosphoglycerate phosphatase1, GOX: glycolate oxidase; GDC-H: GDC-L, glycine decarboxylase complex (GDC) subunit L, GDC-P: GDC subunit P; GDC-T: GDC subunit T; SHM: serine hydroxymethyltransferase; AGT1: serine glyoxylate aminotransferase, HPR: hydroxypyruvate reductase ; GLYK: D-glycerate 3-kinase; GLT1: glutamate synthase 1; GS2: glutamine synthase 2; GOTAT: glutamine oxoglutarate aminotransferase; PLGG: chloroplastidic glycolate/glycerate transporter.)

## 15. Comparison of protein-to-transcript ratio

### Methods

We compared the protein-to-mRNA ratio (PTR) between genes across five

*Flaveria* species. Low PTR genes and high PTR genes were defined as genes with PTR values less than the mean PTR minus standard deviation (SD) and higher than the mean PTR plus SD, respectively. The remaining genes were defined as moderate PTR genes. Enriched gene ontology (GO) terms were calculated using *Fisher's* test as mentioned above. The protein abundances and transcript abundances of *Arabidopsis thaliana* (Atha) were inferred from a previously study <sup>32</sup>. To compare PTR between photosynthetic genes and the remaining genes, photosynthetic genes were defined as those with gene ontology of GO:0015979.

### Results

An average of 166 low PTR genes (from 121 to 201) and 395 high PTR genes (from 375 to 462) were obtained from the five species (Fig. S 33 a). The low PTR genes were enriched in gene ontology (GO) of photosynthesis and photosynthesis related GO terms, including chloroplast and, PSII (Fig. S 33 c). Additionally, photosynthetic genes showed a trend towards lower PTR (Fig. S 34), consistent with an early study in *Arabidopsis thaliana* (Atha), which showed that photosynthesis related genes had significantly lower PTRs than other genes in photosynthetic functional leaf tissues <sup>32</sup>, but not in old leaves (Fig. S 35) or other tissues <sup>32</sup>.



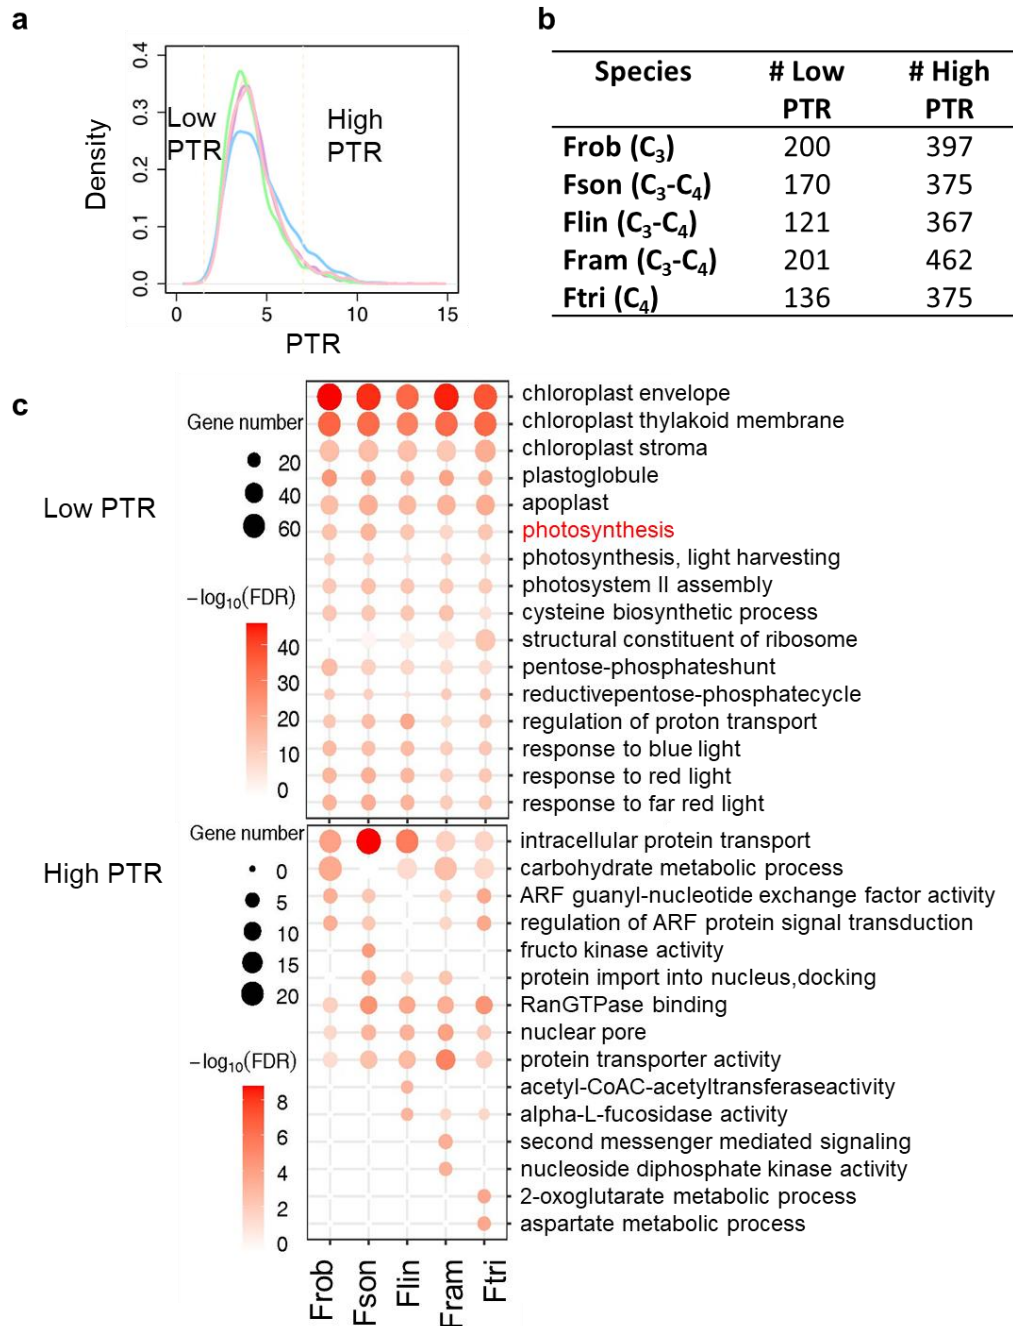

**Fig. S 33. High and low PTR genes and their enriched functions in five *Flaveria* species**  
 (A) The protein-to-mRNA ratio (PTR) distribution of genes from the five *Flaveria* species. High PTR and low PTR genes are defined as genes with PTR higher than the mean plus one standard deviation (SD) and with PTR values lower than the mean minus one SD respectively. (A) the number of low and high PTR genes for each species. (C) Enriched gene ontology of low PTR and high PTR genes, which were calculated using *Fisher's* test with a *P*-value threshold of 0.001 (Benjamini & Hochberg adjusted). (Abbreviation: PTR: protein-to-mRNA ratio.)

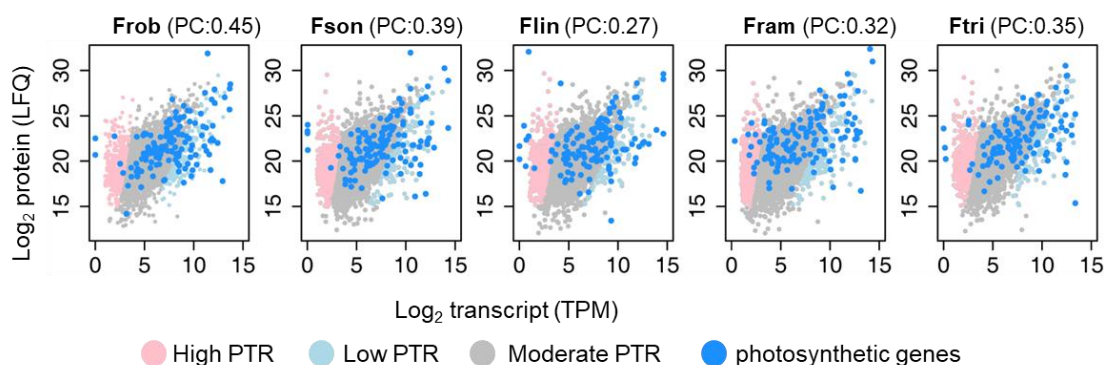

Fig. S 34. **Scatter plots of protein versus transcript abundance in photosynthetic genes**

Pearson correlation (PC) between protein abundance and transcript abundance shown in the parentheses on the top of each panel. Note that photosynthetic genes usually have either moderate or low PTR compared to non-photosynthetic genes in the five *Flaveria* species. (Abbreviations: PTR: protein-to-mRNA ratio; PS. Photosynthesis.)

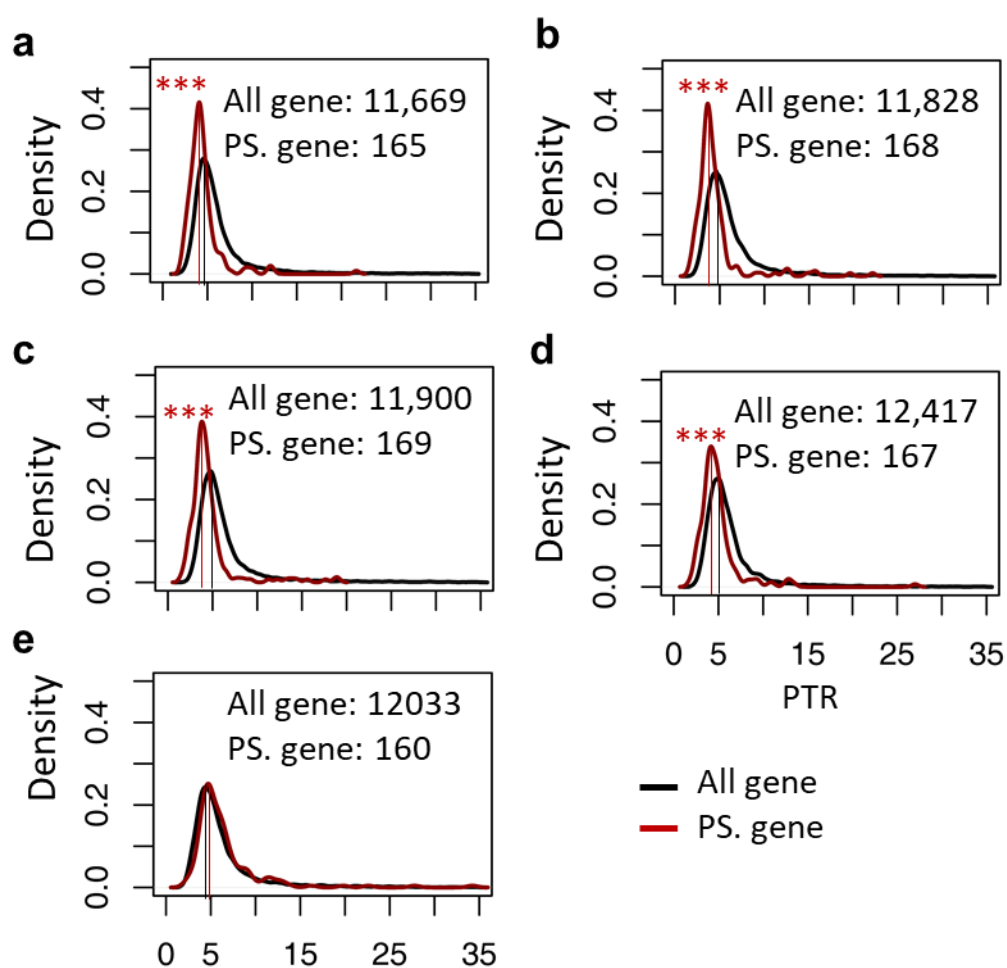

Fig. S 35. **Photosynthetic genes have lower PTRs than other genes in photosynthetic active leaves of *Arabidopsis thaliana***

The distribution of PTRs of all detected genes and photosynthetic related genes in (a) 1<sup>st</sup>

cauline leaf, (b) distal part of rosette leaf 7, (c) proximal part of rosette leaf 7, (d) petiole of rosette leaf 7, and (e) senescent leaf. Photosynthetic genes have annotated gene ontology of GO:0015979. The number of all detected genes and photosynthetic related genes in each leaf sample are showed within the panel. Figures were drawn based on data in supplementary data 4 from a prior study <sup>32</sup>. (Abbreviations: PTR: protein-to-mRNA ratio; PS. Photosynthesis.)



## References

- 1 Li, S. F. *et al.* The landscape of transposable elements and satellite DNAs in the genome of a dioecious plant spinach (*Spinacia oleracea* L.). *Mob DNA* **10**, 3, doi:10.1186/s13100-019-0147-6 (2019).
- 2 Seppey, M., Manni, M. & Zdobnov, E. M. BUSCO: Assessing Genome Assembly and Annotation Completeness. *Methods Mol Biol* **1962**, 227-245, doi:10.1007/978-1-4939-9173-0\_14 (2019).
- 3 Li, B. & Dewey, C. N. RSEM: accurate transcript quantification from RNA-Seq data with or without a reference genome. *BMC Bioinformatics* **12**, 323, doi:10.1186/1471-2105-12-323 (2011).
- 4 Dobin, A. *et al.* STAR: ultrafast universal RNA-seq aligner. *Bioinformatics* **29**, 15-21, doi:10.1093/bioinformatics/bts635 (2013).
- 5 Langmead, B. & Salzberg, S. L. Fast gapped-read alignment with Bowtie 2. *Nature Methods* **9**, 357-U354, doi:10.1038/Nmeth.1923 (2012).
- 6 Taniguchi, Y. Y. *et al.* Dynamic changes of genome sizes and gradual gain of cell-specific distribution of C4 enzymes during C4 evolution in genus *Flaveria*. *Plant Genome*, e20095, doi:10.1002/tpg2.20095 (2021).
- 7 Min, X. J., Butler, G., Storms, R. & Tsang, A. OrfPredictor: predicting protein-coding regions in EST-derived sequences. *Nucleic Acids Res* **33**, W677-680, doi:10.1093/nar/gki394 (2005).
- 8 Camacho, C. *et al.* BLAST plus : architecture and applications. *BMC Bioinformatics* **10**, doi:<https://doi.org/10.1186/1471-2105-10-421> (2009).
- 9 Emms, D. M. & Kelly, S. OrthoFinder: phylogenetic orthology inference for comparative genomics. *Genome Biol* **20**, 238, doi:10.1186/s13059-019-1832-y (2019).
- 10 Edgar, R. C. MUSCLE: multiple sequence alignment with high accuracy and high throughput. *Nucleic Acids Research* **32**, 1792-1797, doi:10.1093/nar/gkh340 (2004).
- 11 Stamatakis, A. RAxML-VI-HPC: Maximum likelihood-based phylogenetic analyses with thousands of taxa and mixed models. *Bioinformatics* **22**, 2688-2690, doi:10.1093/bioinformatics/btl446 (2006).
- 12 Lyu, M. J. *et al.* What Matters for C<sub>4</sub> Transporters: Evolutionary Changes of Phosphoenolpyruvate Transporter for C<sub>4</sub> Photosynthesis. *Front Plant Sci* **11**, 935, doi:10.3389/fpls.2020.00935 (2020).
- 13 Xu, Z. & Wang, H. LTR\_FINDER: an efficient tool for the prediction of full-length LTR retrotransposons. *Nucleic Acids Research* **35**, W265-W268, doi:10.1093/nar/gkm286 (2007).
- 14 Ellinghaus, D., Kurtz, S. & Willhoeft, U. LTRharvest, an efficient and flexible software for de novo detection of LTR retrotransposons. *BMC Bioinformatics* **9**, 18, doi:10.1186/1471-2105-9-18 (2008).
- 15 Ou, S. & Jiang, N. LTR\_retriever: A Highly Accurate and Sensitive Program for Identification of Long Terminal Repeat Retrotransposons. *Plant Physiol* **176**, 1410-1422, doi:10.1104/pp.17.01310 (2018).
- 16 Kaessmann, H., Vinckenbosch, N. & Long, M. RNA-based gene duplication: mechanistic and evolutionary insights. *Nat Rev Genet* **10**, 19-31, doi:10.1038/nrg2487 (2009).
- 17 Tan, S. *et al.* DNA transposons mediate duplications via transposition-independent and -dependent mechanisms in metazoans. *Nat Commun* **12**, 4280, doi:10.1038/s41467-021-24585-

- 9 (2021).
- 18 Xiao, H., Jiang, N., Schaffner, E., Stockinger, E. J. & van der Knaap, E. A retrotransposon-mediated gene duplication underlies morphological variation of tomato fruit. *Science* **319**, 1527-1530, doi:10.1126/science.1153040 (2008).
  - 19 Tan, S. J. *et al.* LTR-mediated retroposition as a mechanism of RNA-based duplication in metazoans. *Genome Research* **26**, 1663-1675, doi:10.1101/gr.204925.116 (2016).
  - 20 Zhu, Z., Tan, S., Zhang, Y. & Zhang, Y. E. LINE-1-like retrotransposons contribute to RNA-based gene duplication in dicots. *Sci Rep* **6**, 24755, doi:10.1038/srep24755 (2016).
  - 21 Hu, Y. *et al.* Rapid Genome Evolution and Adaptation of *Thlaspi arvense* Mediated by Recurrent RNA-Based and Tandem Gene Duplications. *Front Plant Sci* **12**, 772655, doi:10.3389/fpls.2021.772655 (2021).
  - 22 Akyildiz, M. *et al.* Evolution and function of a cis-regulatory module for mesophyll-specific gene expression in the C<sub>4</sub> dicot *Flaveria trinervia*. *Plant Cell* **19**, 3391-3402, doi:10.1105/tpc.107.053322 (2007).
  - 23 Marand, A. P., Chen, Z. L., Gallavotti, A. & Schmitz, R. J. A cis-regulatory atlas in maize at single-cell resolution. *Cell* **184**, 3041-+, doi:10.1016/j.cell.2021.04.014 (2021).
  - 24 Burgess, S. J. *et al.* Genome-Wide Transcription Factor Binding in Leaves from C<sub>3</sub> and C<sub>4</sub> Grasses. *Plant Cell* **31**, 2297-2314, doi:10.1105/tpc.19.00078 (2019).
  - 25 Heinz, S. *et al.* Simple combinations of lineage-determining transcription factors prime cis-regulatory elements required for macrophage and B cell identities. *Mol Cell* **38**, 576-589, doi:10.1016/j.molcel.2010.05.004 (2010).
  - 26 Lyu, M. J. *et al.* Evolution of gene regulatory network of C<sub>4</sub> photosynthesis in the genus *Flaveria* reveals the evolutionary status of C<sub>3</sub>-C<sub>4</sub> intermediate species. *Plant Commun* **4**, 100426, doi:10.1016/j.xplc.2022.100426 (2023).
  - 27 Zheng, G. *et al.* CMIP: a software package capable of reconstructing genome-wide regulatory networks using gene expression data. *BMC Bioinformatics* **17**, 535, doi:10.1186/s12859-016-1324-y (2016).
  - 28 Zhang, X. J. *et al.* Inferring gene regulatory networks from gene expression data by path consistency algorithm based on conditional mutual information. *Bioinformatics* **28**, 98-104, doi:10.1093/bioinformatics/btr626 (2012).
  - 29 Reyna-Llorens, I. & Hibberd, J. M. Recruitment of pre-existing networks during the evolution of C<sub>4</sub> photosynthesis. *Philos Trans R Soc Lond B Biol Sci* **372**, doi:10.1098/rstb.2016.0386 (2017).
  - 30 Zhu, M.-J. A. L. J. E. F. C. G. C. X.-G. Evolution of co-regulatory network of C<sub>4</sub> metabolic genes and TFs in the genus *Flaveria*: go anear or away in the intermediate species? *BioRxiv*, doi:10.1101/2020.10.02.324558 (2020).
  - 31 Mallmann, J. *et al.* The role of photorespiration during the evolution of C<sub>4</sub> photosynthesis in the genus *Flaveria*. *Elife* **3**, e02478, doi:10.7554/eLife.02478 (2014).
  - 32 Mergner, J. *et al.* Mass-spectrometry-based draft of the *Arabidopsis* proteome. *Nature* **579**, 409-414, doi:10.1038/s41586-020-2094-2 (2020).
